# Supplementary material for: Integrated multi-omics reveal polycomb repressive complex 2 restricts human trophoblast induction
Source: PubMed Central journal article supplement (PMC9203278; doi:10.1038/s41556-022-00932-w), 2022-06-13
Supplement: 41556_2022_932_MOESM1_ESM.pdf [file 41556_2022_932_MOESM1_ESM.pdf]

**Supplementary information**

---

**Integrated multi-omics reveal polycomb repressive complex 2 restricts human trophoblast induction**

---

In the format provided by the authors and unedited

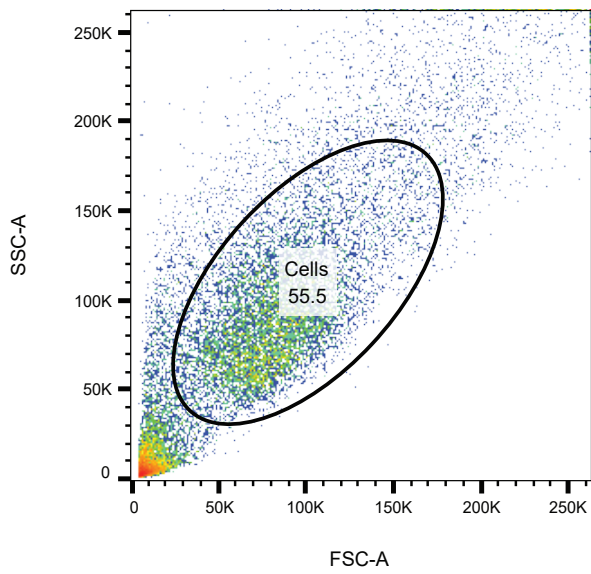

Specimen\_001\_Primed No UNC Rep1\_001.fcs  
 Ungated  
 20000

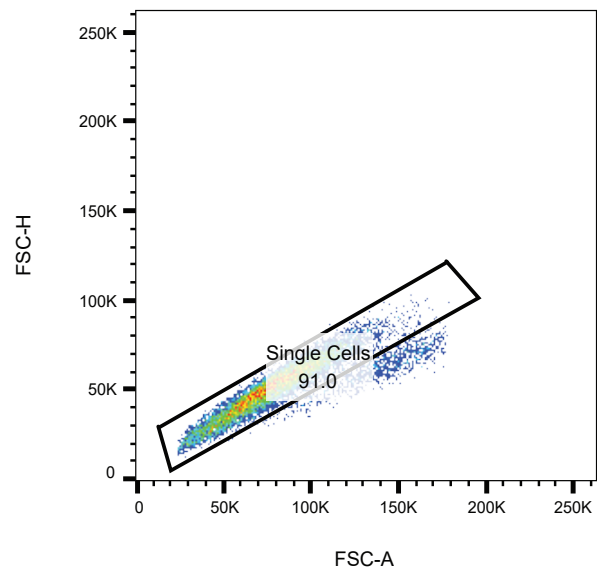

Specimen\_001\_Primed No UNC Rep1\_001.fcs  
 Cells  
 11108

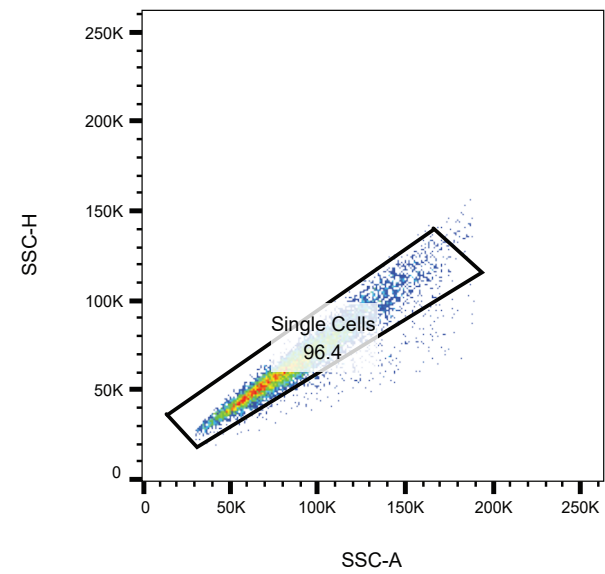

Specimen\_001\_Primed No UNC Rep1\_001.fcs  
 Single Cells  
 10105

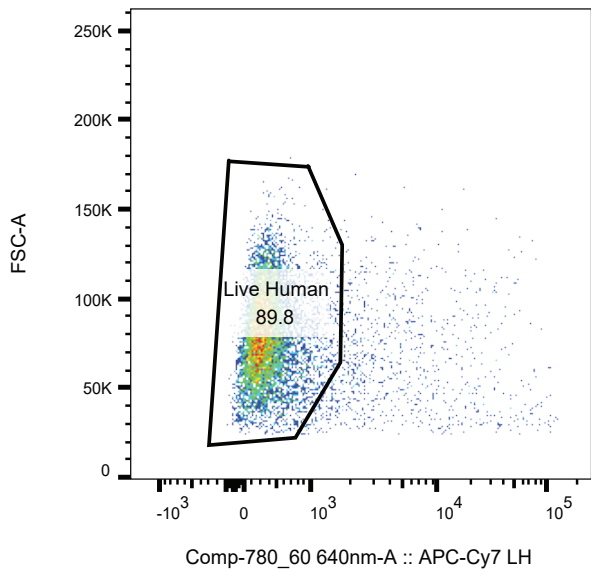

Specimen\_001\_Primed No UNC Rep1\_001.fcs  
 Single Cells  
 9742

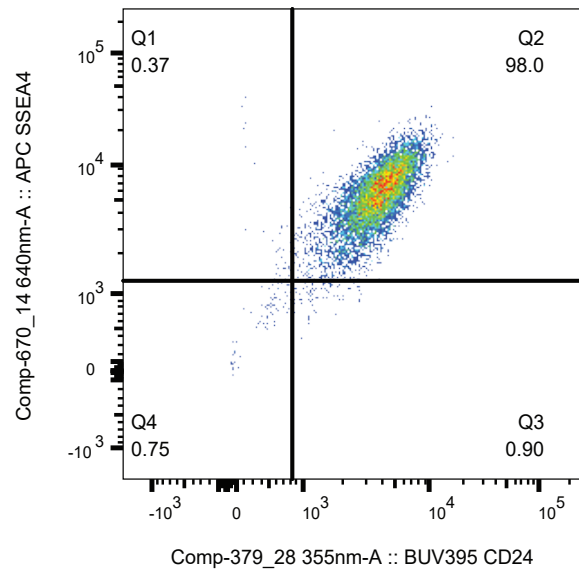

Specimen\_001\_Primed No UNC Rep1\_001.fcs  
 Live Human  
 8745

Extended Data Figure 4i

Supplementary Figure 1.  
 Flow cytometry and gating  
 strategies for Extended  
 Data Figure 4i, Extended  
 Data Figure 5d, Extended  
 Data Figure 5i and  
 Extended Data Figure 7b.

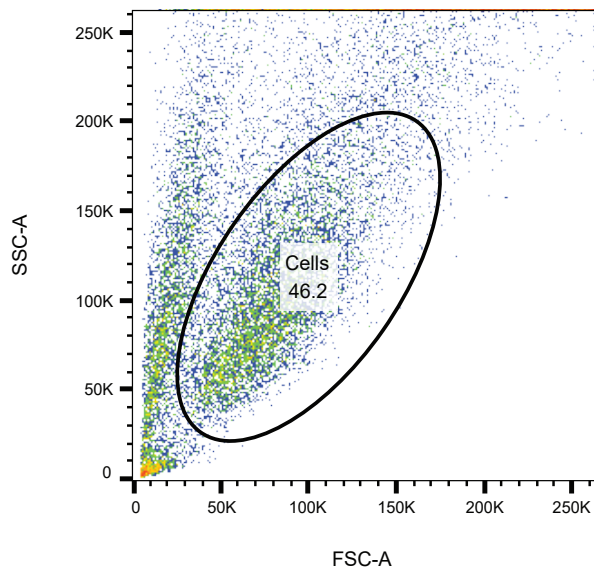

Specimen\_001\_Naive No UNC Rep3\_003.fcs  
Ungated  
20000

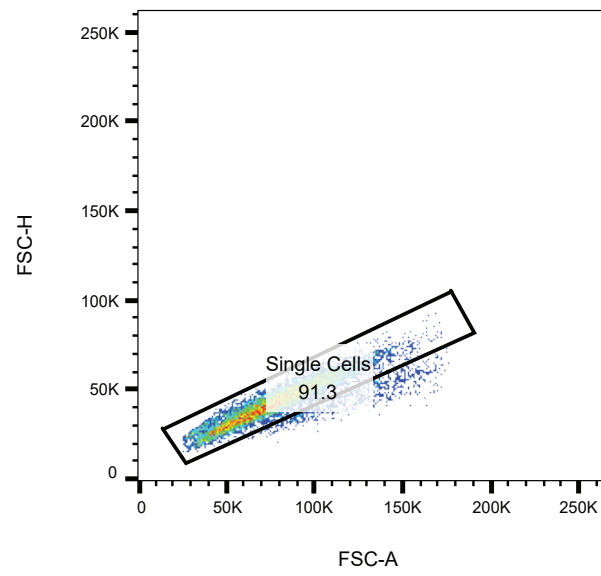

Specimen\_001\_Naive No UNC Rep3\_003.fcs  
Cells  
9243

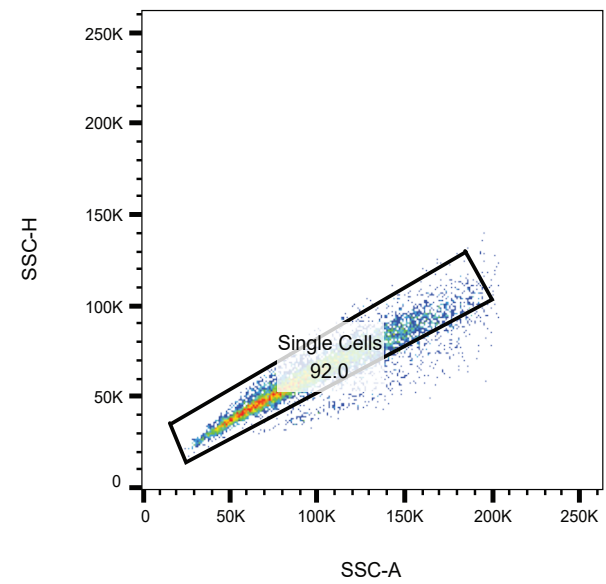

Specimen\_001\_Naive No UNC Rep3\_003.fcs  
Single Cells  
8435

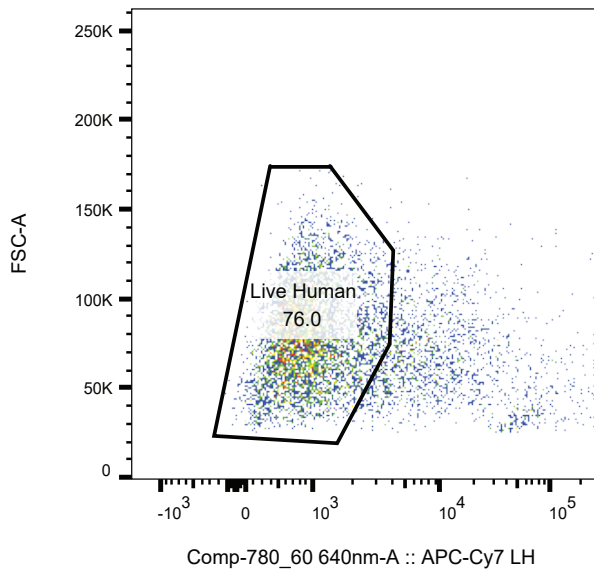

Specimen\_001\_Naive No UNC Rep3\_003.fcs  
Single Cells  
7764

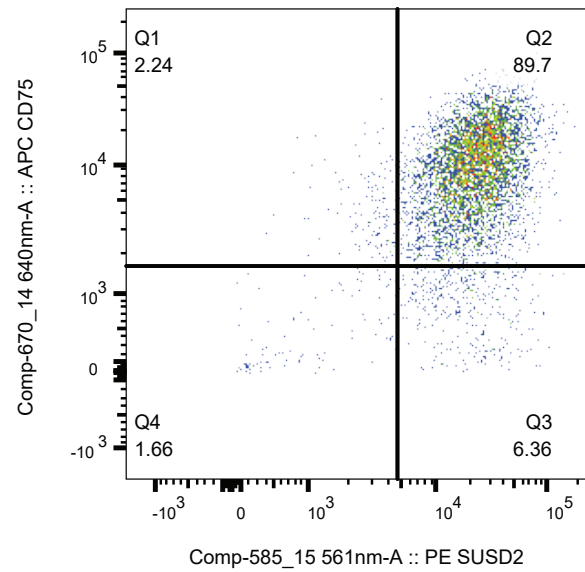

Specimen\_001\_Naive No UNC Rep3\_003.fcs  
Live Human  
5898

Extended Data Figure 4i

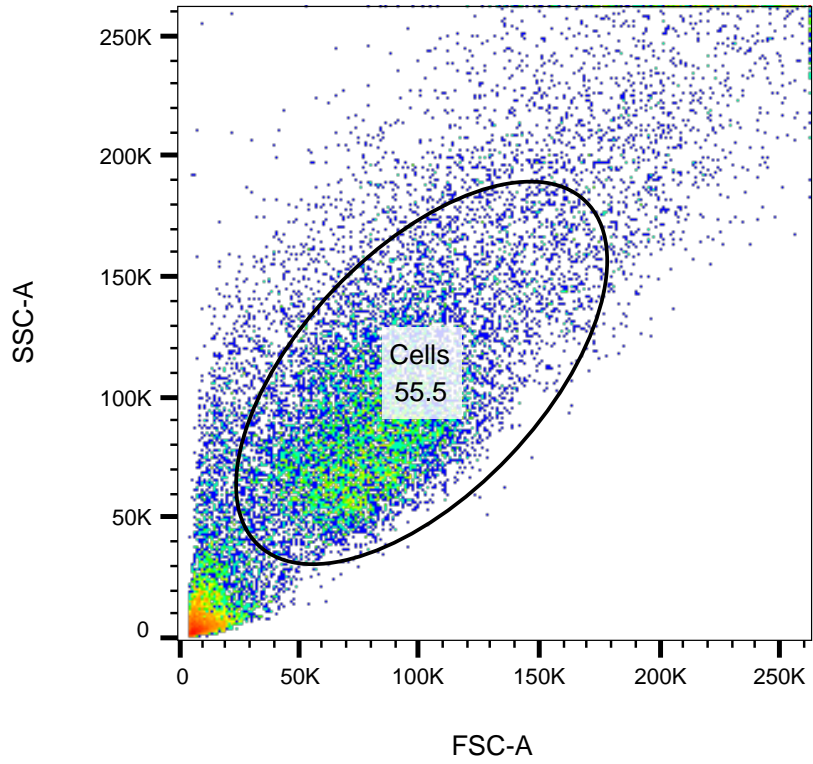

Specimen\_001\_Primered No UNC Rep1\_001.fcs  
Ungated  
20000

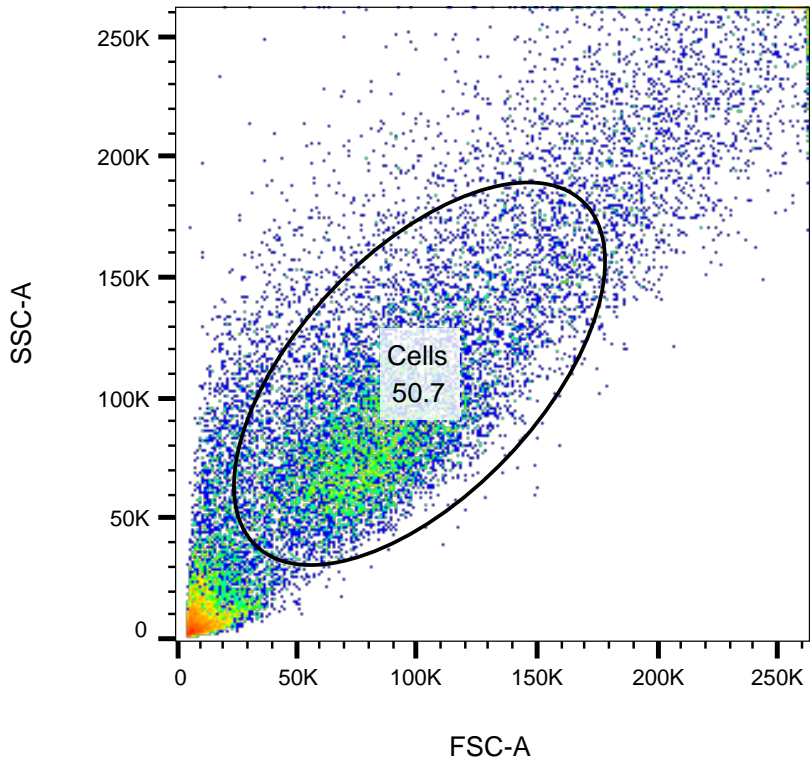

Specimen\_001\_Primed Plus UNC Rep1\_002.fcs  
Ungated  
20000

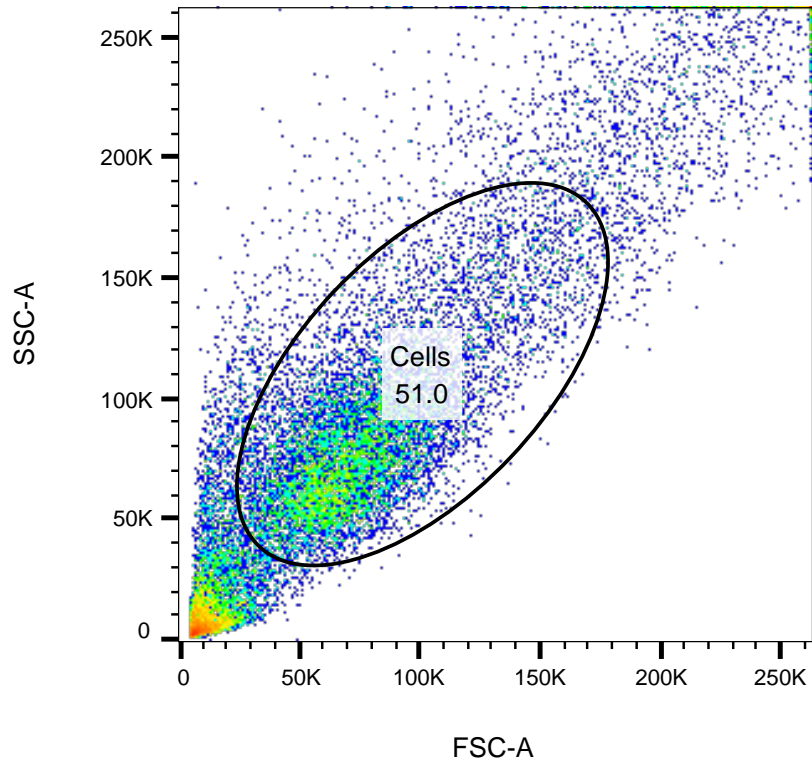

Specimen\_001\_Primered No UNC Rep2\_003.fcs  
Ungated  
20000

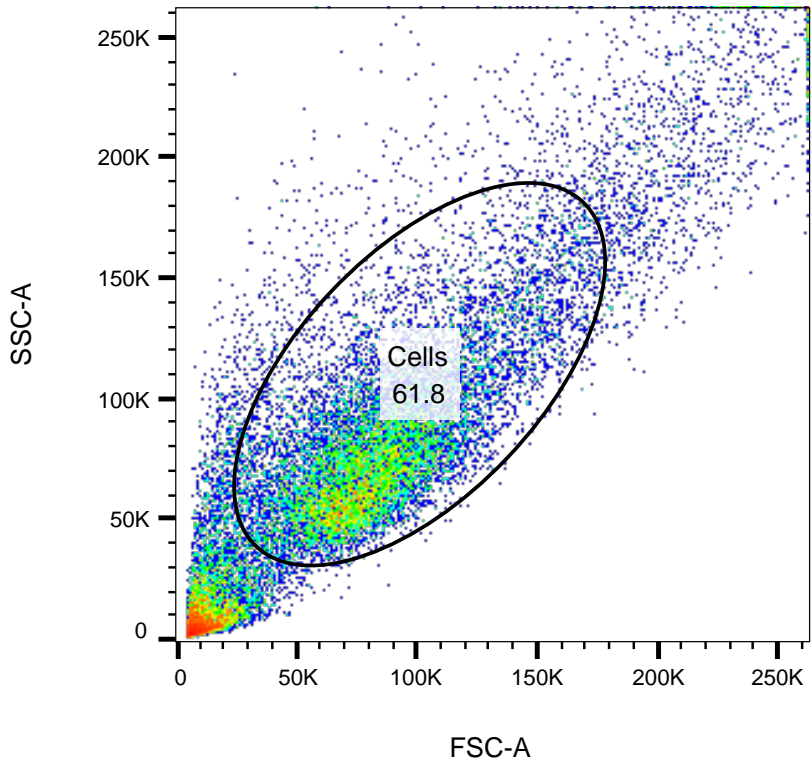

Specimen\_001\_Primer Plus UNC Rep2\_004.fcs  
Ungated  
20000

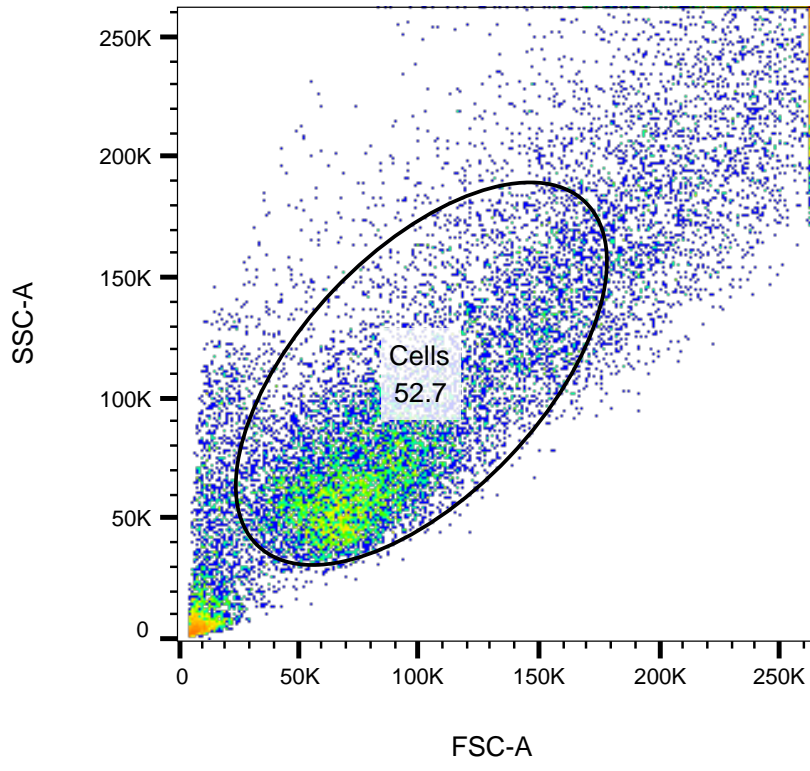

Specimen\_001\_Primer Plus No UNC Rep3\_005.fcs  
Ungated  
20000



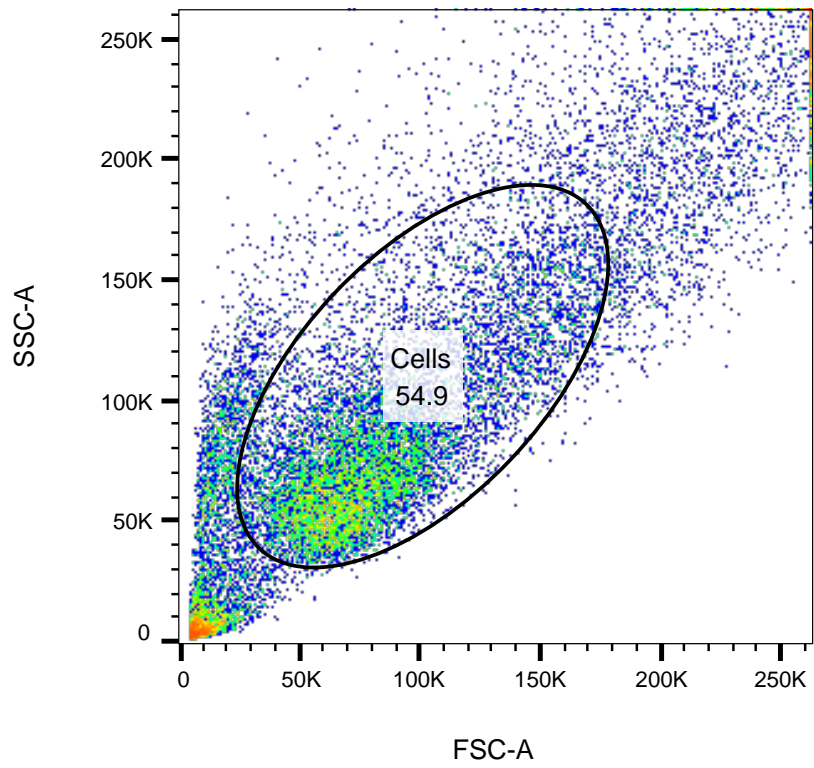

Specimen\_001\_Primer Plus UNC Rep3\_006.fcs  
Ungated  
20000

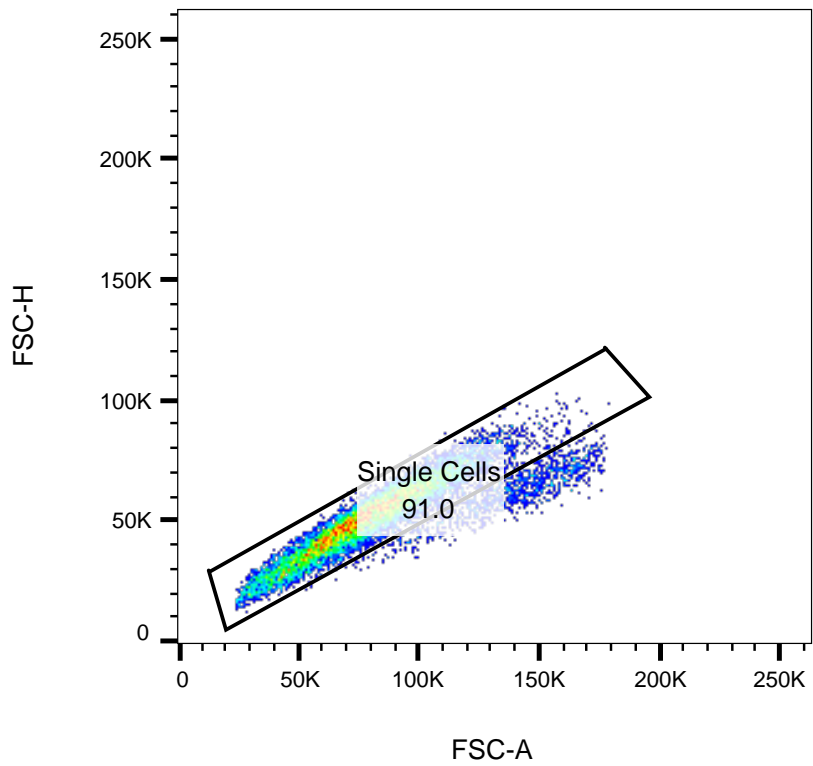

Specimen\_001\_Primered No UNC Rep1\_001.fcs  
Cells  
11108

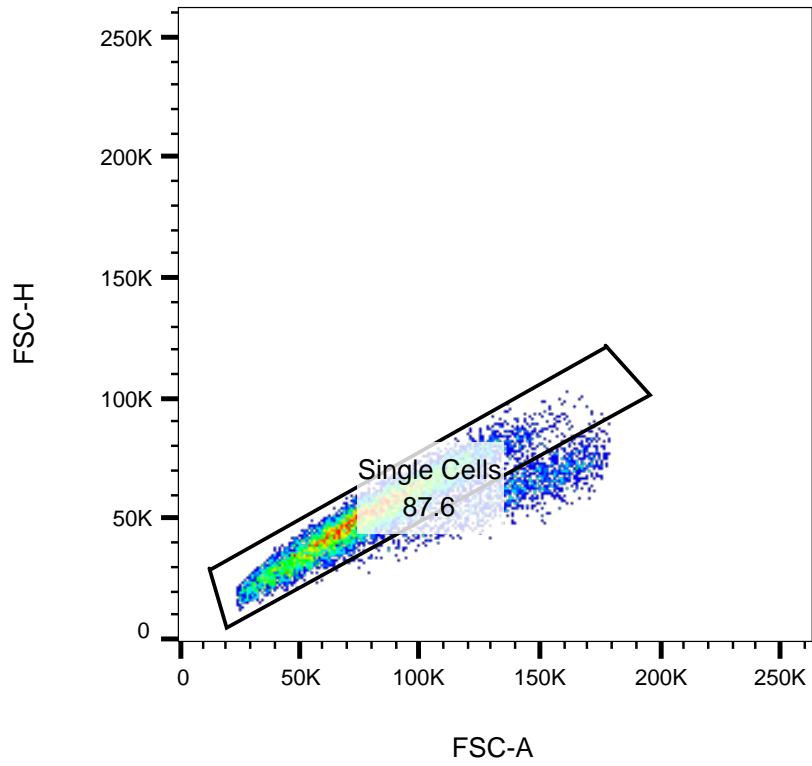

Specimen\_001\_Primed Plus UNC Rep1\_002.fcs  
Cells  
10149

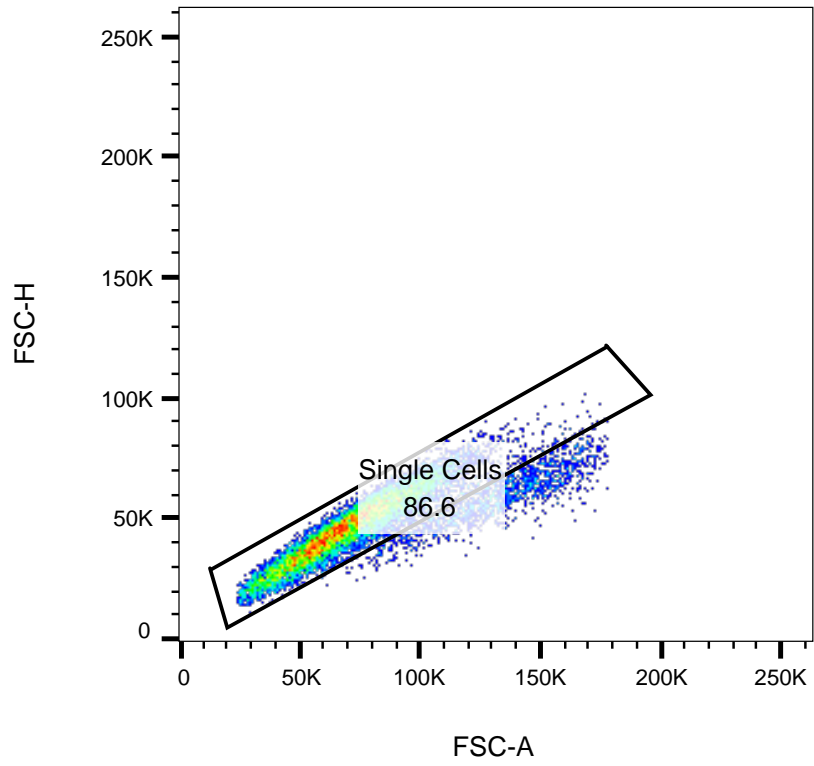

Specimen\_001\_Primed No UNC Rep2\_003.fcs  
Cells  
10194

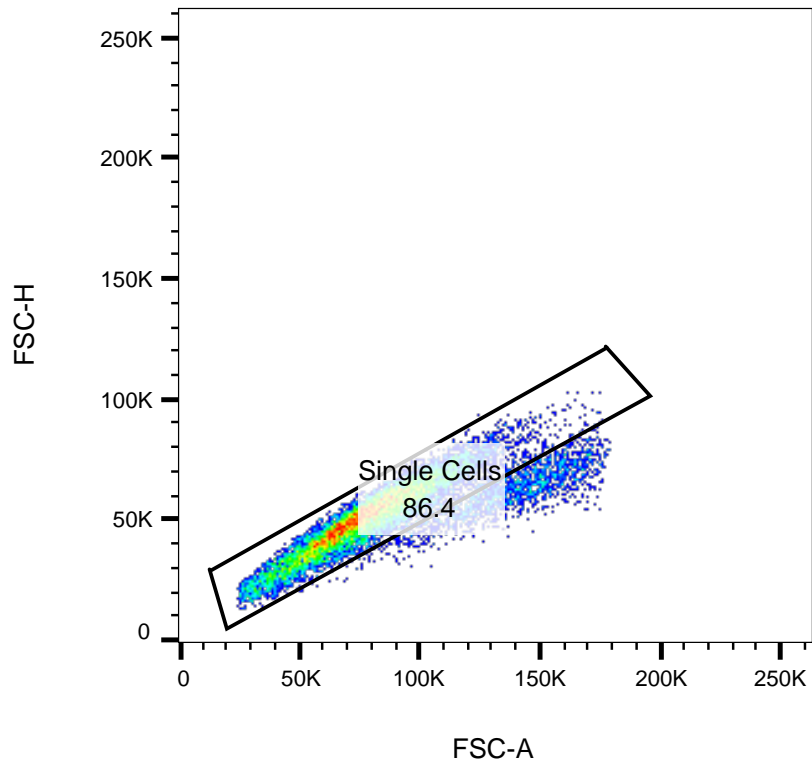

Specimen\_001\_Primed Plus UNC Rep2\_004.fcs  
Cells  
12350

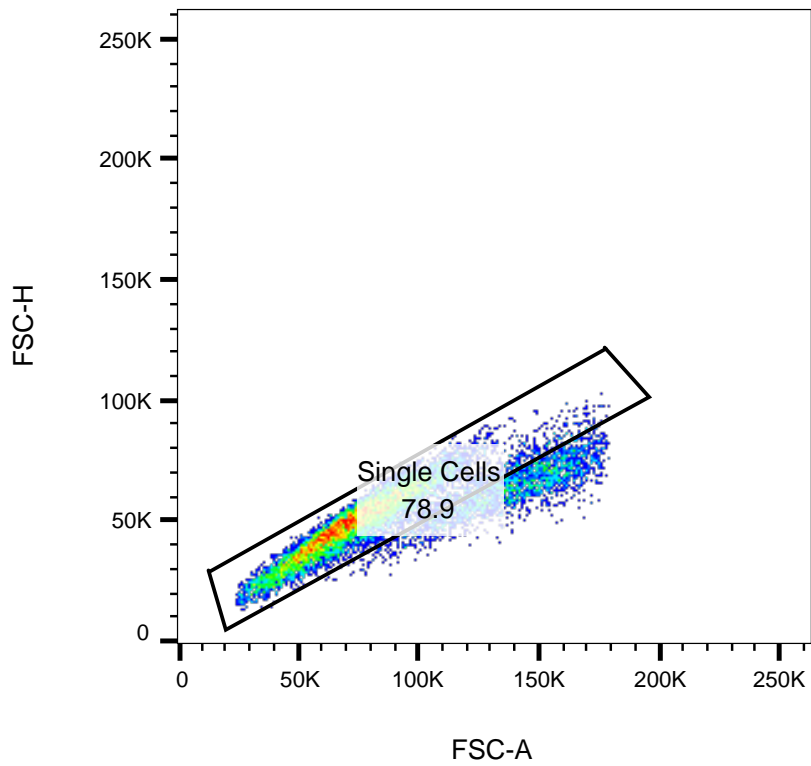

Specimen\_001\_Primed Plus No UNC Rep3\_005.fcs  
Cells  
10544

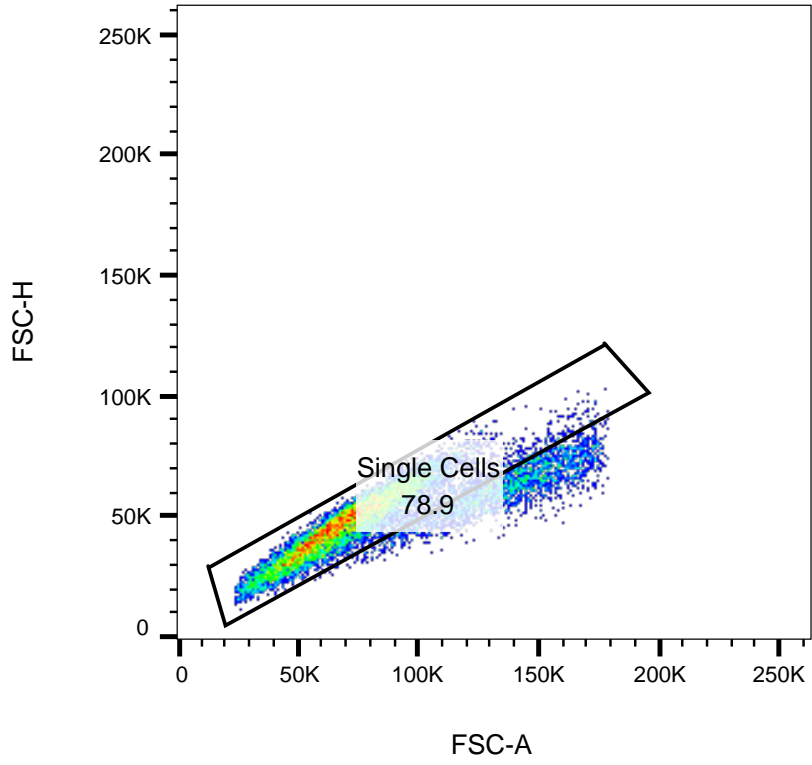

Specimen\_001\_Primer Plus UNC Rep3\_006.fcs  
Cells  
10982

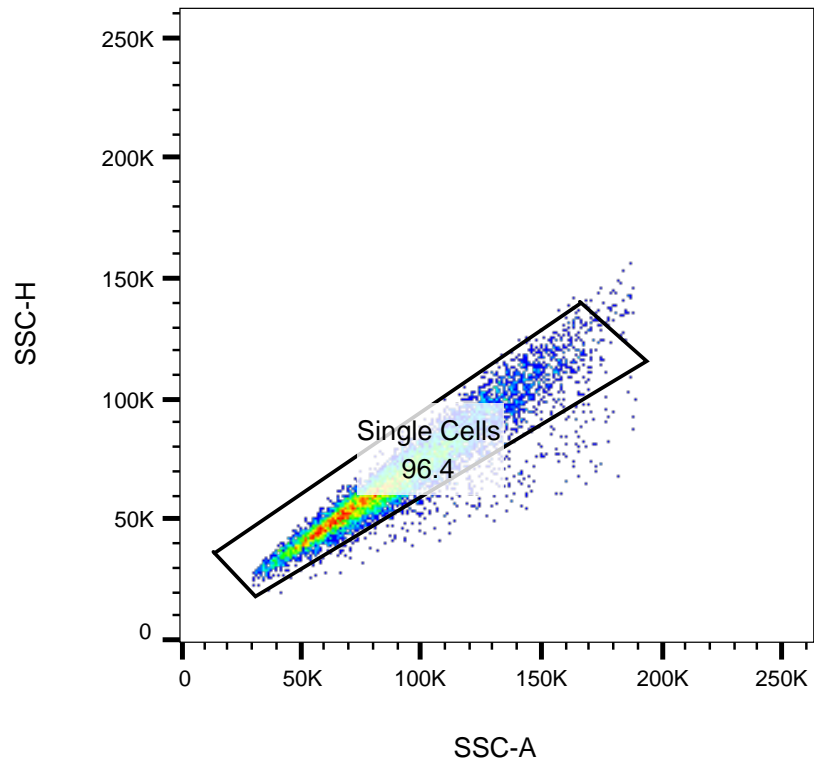

Specimen\_001\_Primed No UNC Rep1\_001.fcs  
Single Cells  
10105



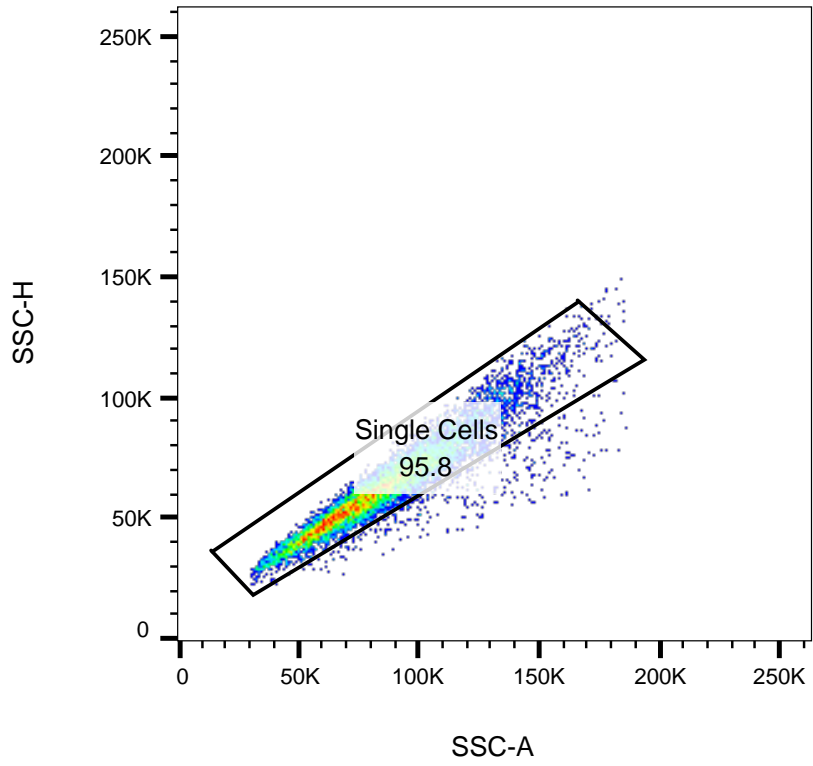

Specimen\_001\_Primed Plus UNC Rep1\_002.fcs  
Single Cells  
8891

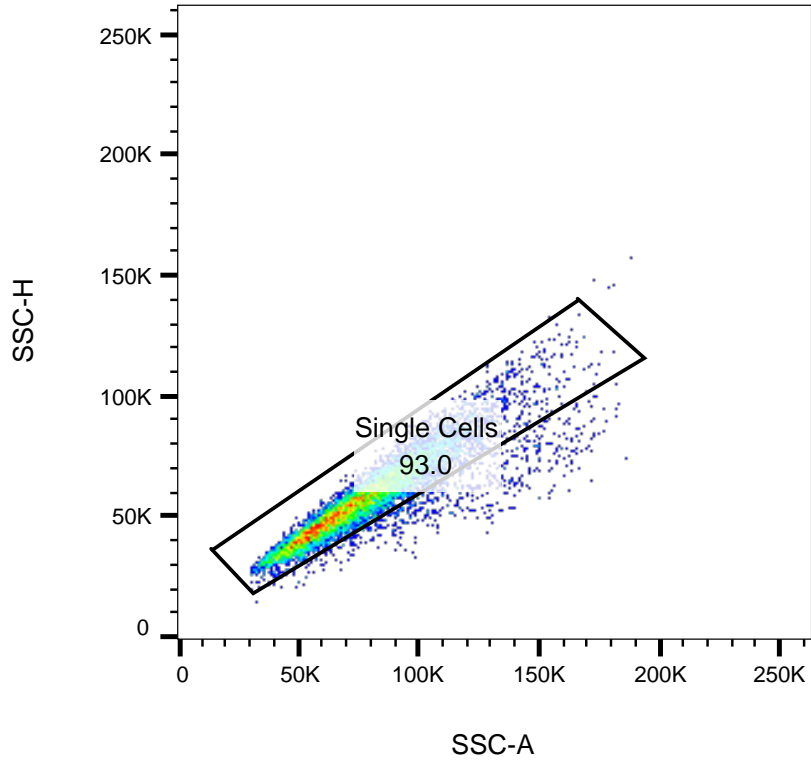

Specimen\_001\_Primered No UNC Rep2\_003.fcs  
Single Cells  
8829

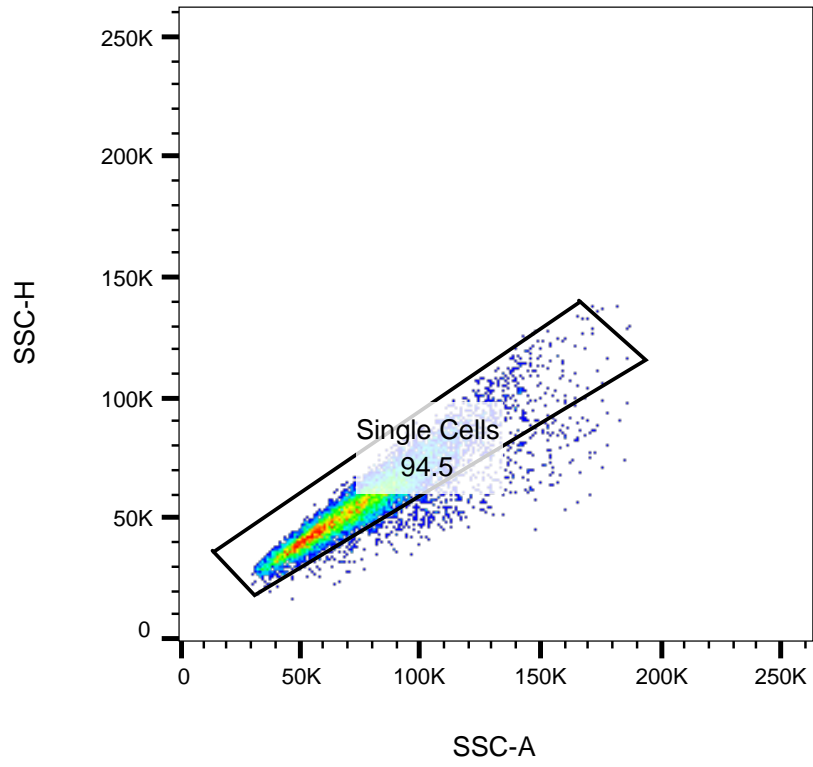

Specimen\_001\_Primer Plus UNC Rep2\_004.fcs  
Single Cells  
10672

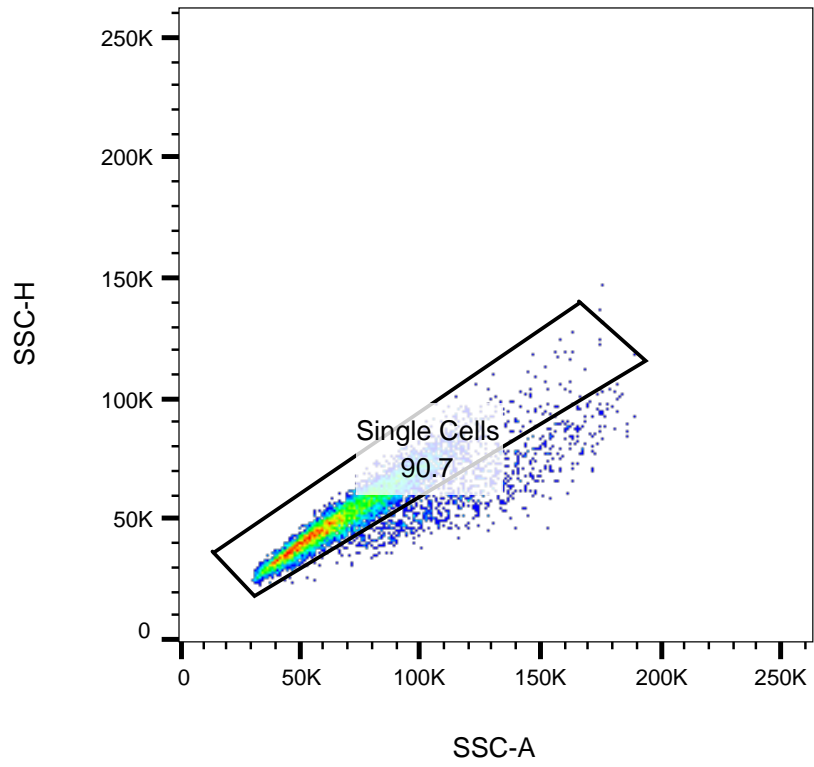

Specimen\_001\_Primed Plus No UNC Rep3\_005.fcs  
Single Cells  
8315

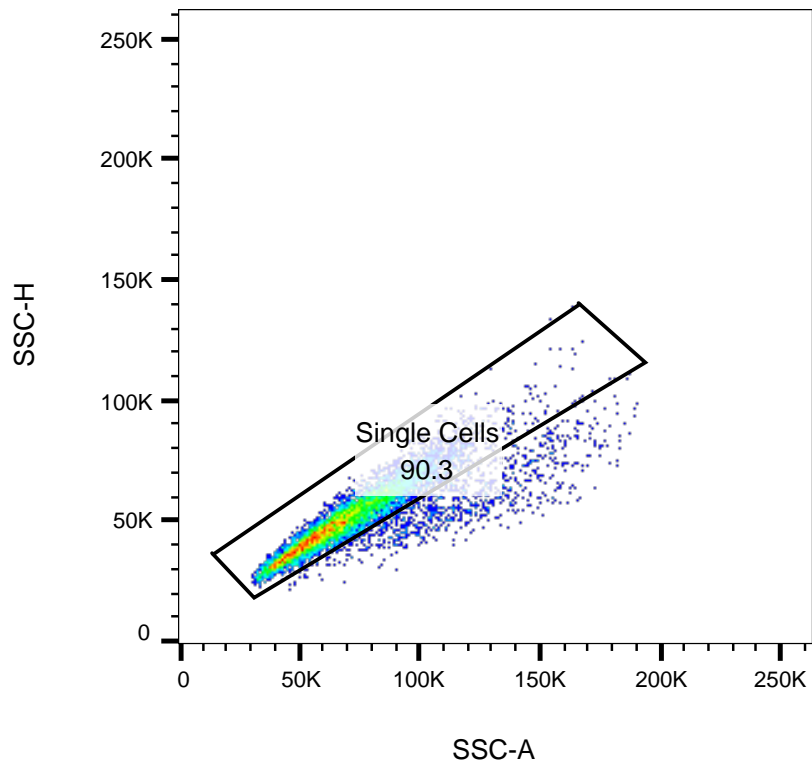

Specimen\_001\_Primed Plus UNC Rep3\_006.fcs  
Single Cells  
8670

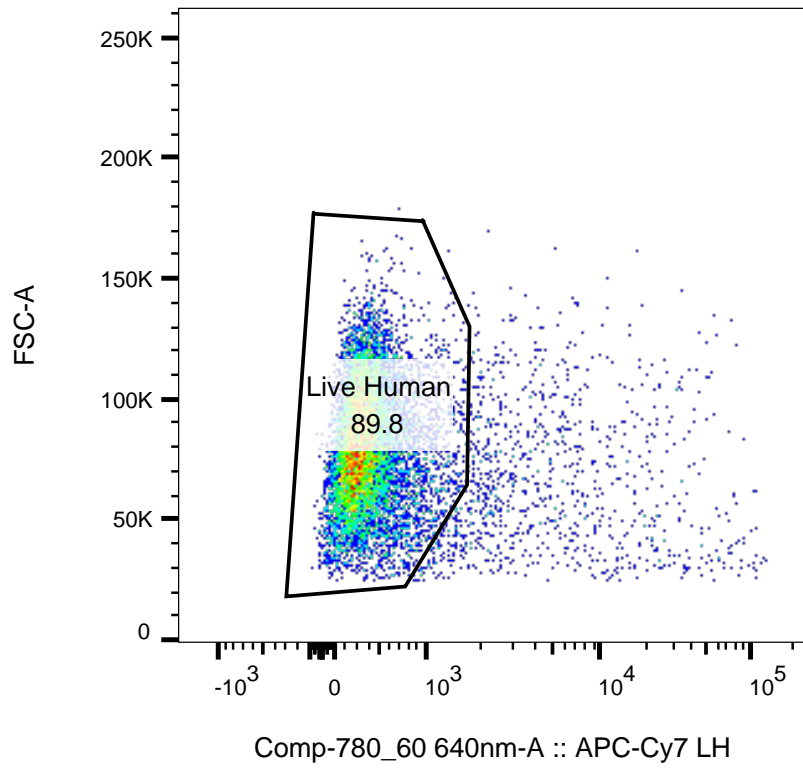

Specimen\_001\_Primered No UNC Rep1\_001.fcs  
Single Cells  
9742

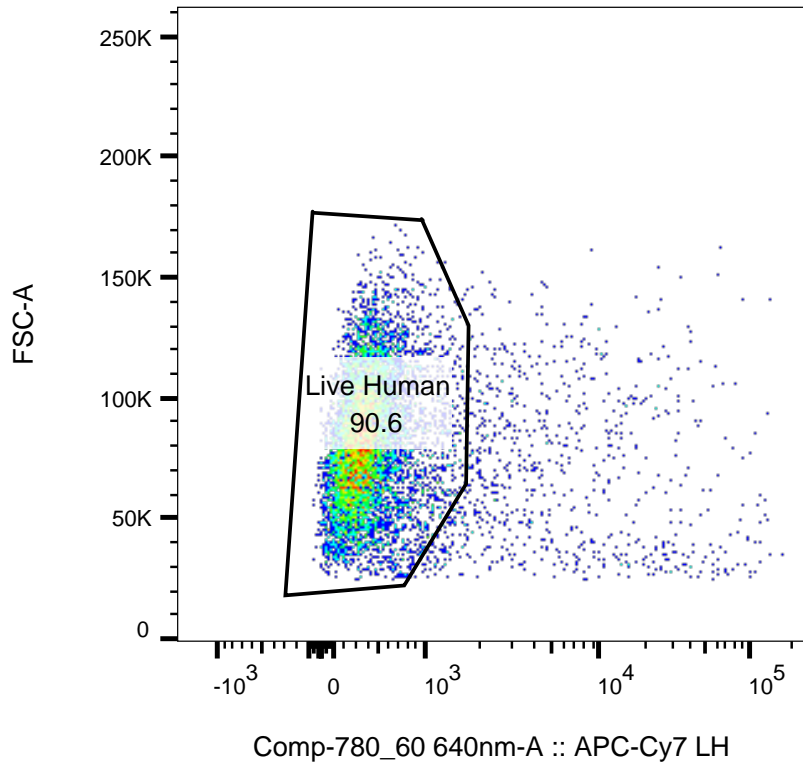

Specimen\_001\_Primer Plus UNC Rep1\_002.fcs  
Single Cells  
8514

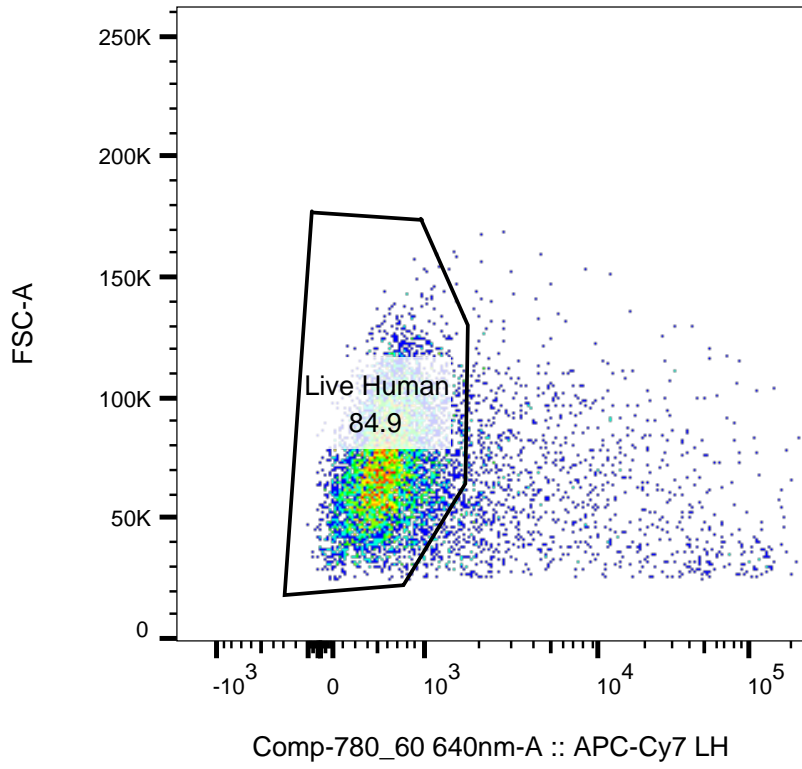

Specimen\_001\_Primerd No UNC Rep2\_003.fcs  
Single Cells  
8213



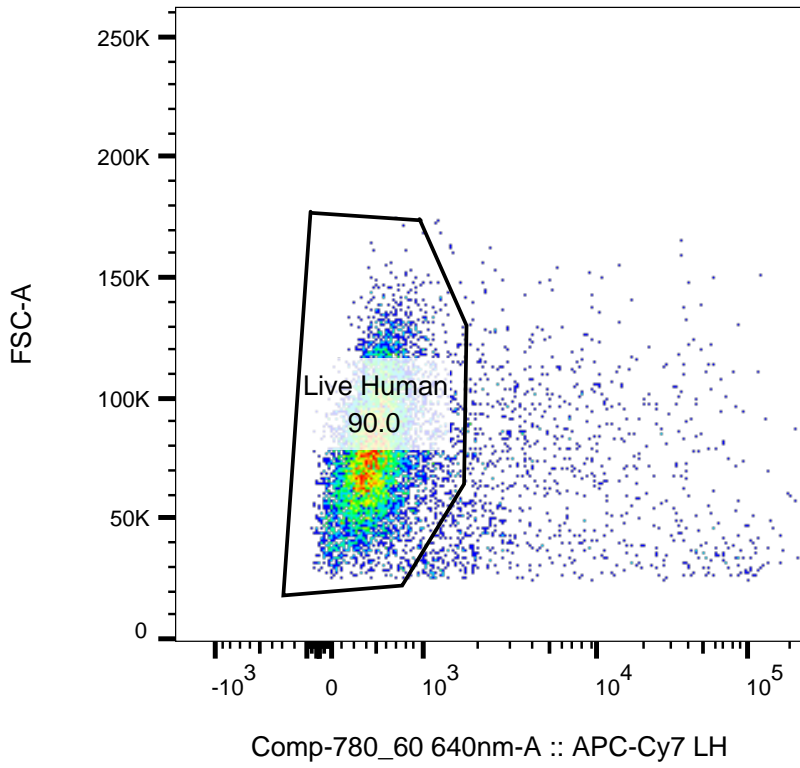

Specimen\_001\_Primer Plus UNC Rep2\_004.fcs  
Single Cells  
10085

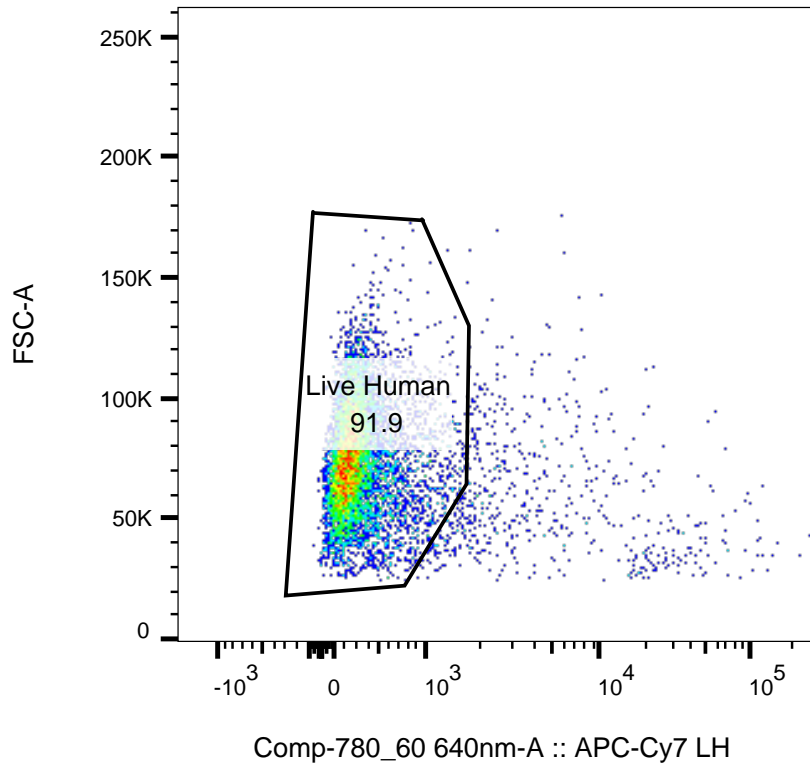

Specimen\_001\_Primer Plus No UNC Rep3\_005.fcs  
Single Cells  
7538

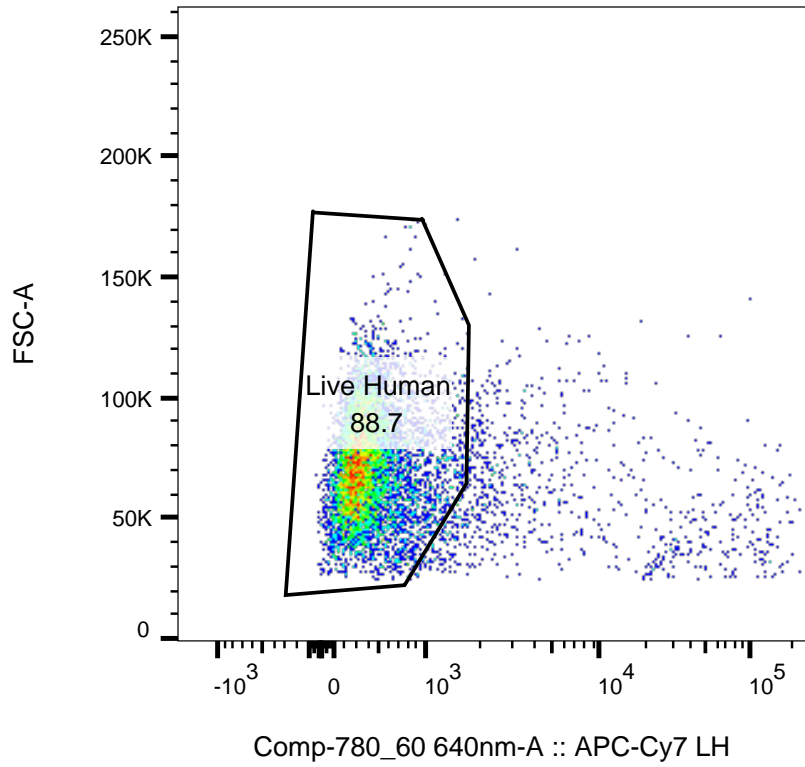

Specimen\_001\_Primerd Plus UNC Rep3\_006.fcs  
Single Cells  
7827

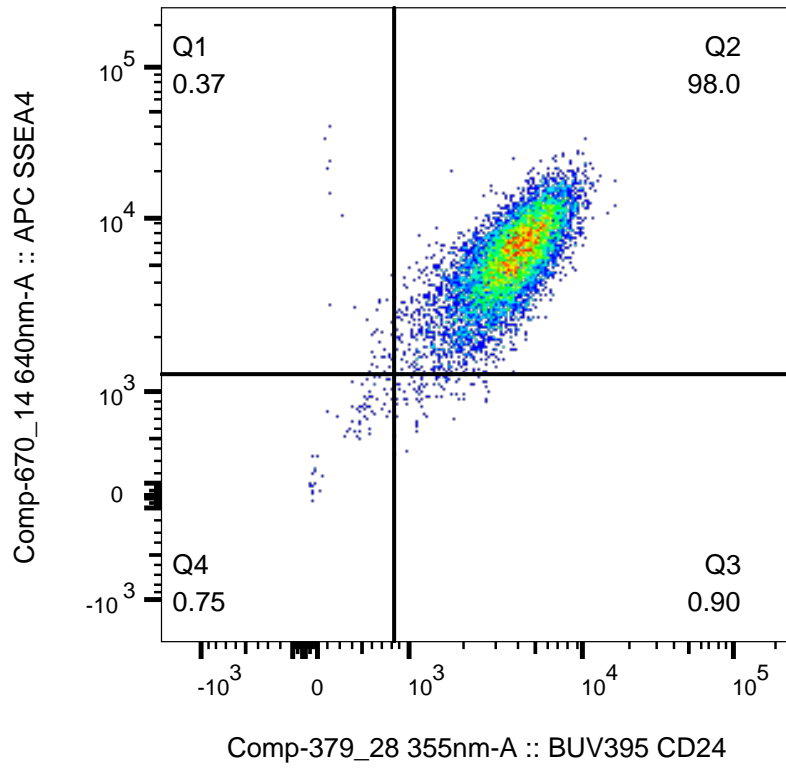

Specimen\_001\_Primered No UNC Rep1\_001.fcs  
Live Human  
8745

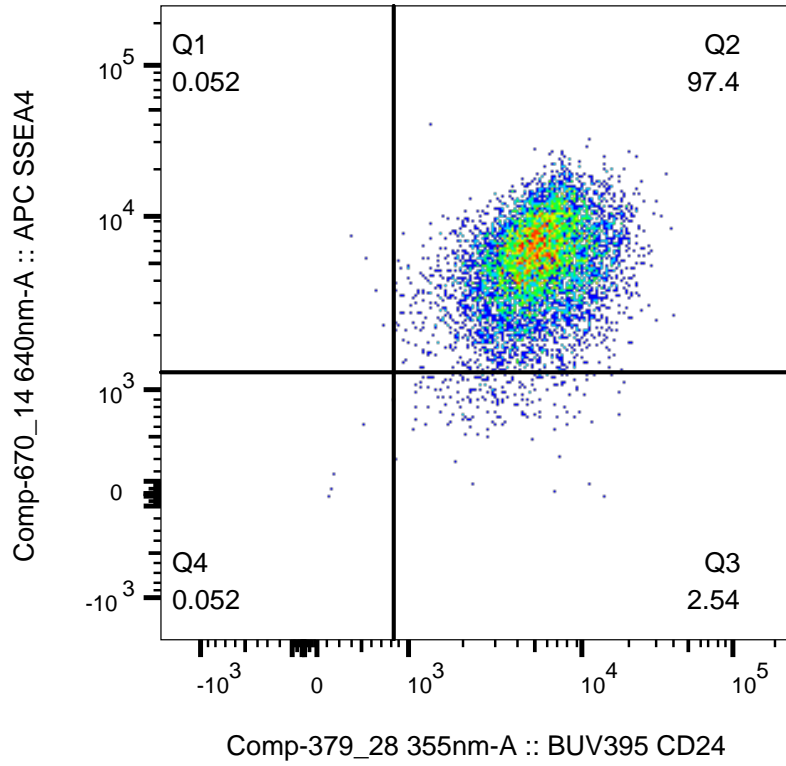

Specimen\_001\_Primed Plus UNC Rep1\_002.fcs  
Live Human  
7711

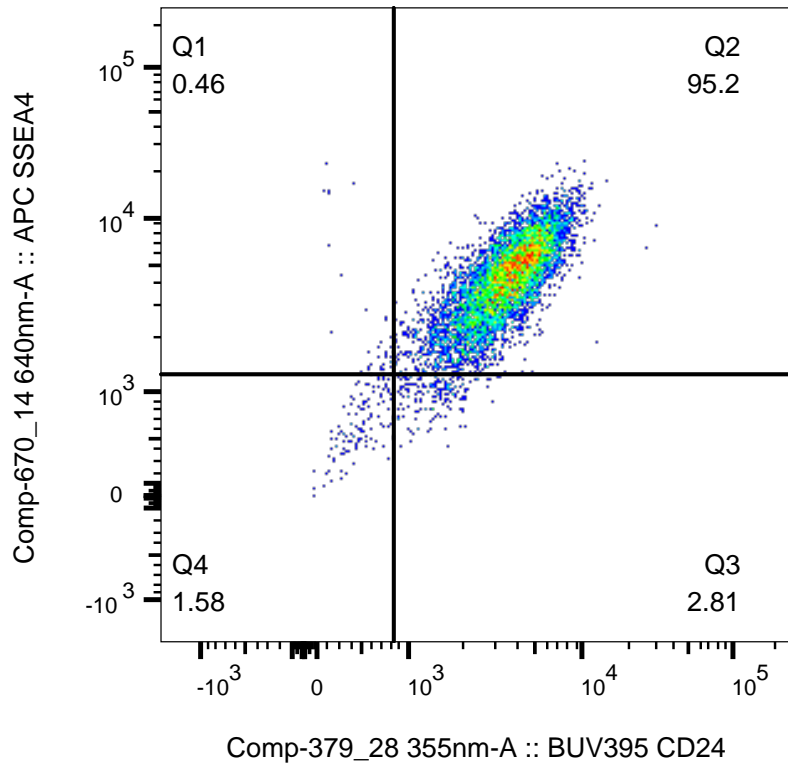

Specimen\_001\_Primered No UNC Rep2\_003.fcs  
Live Human  
6974

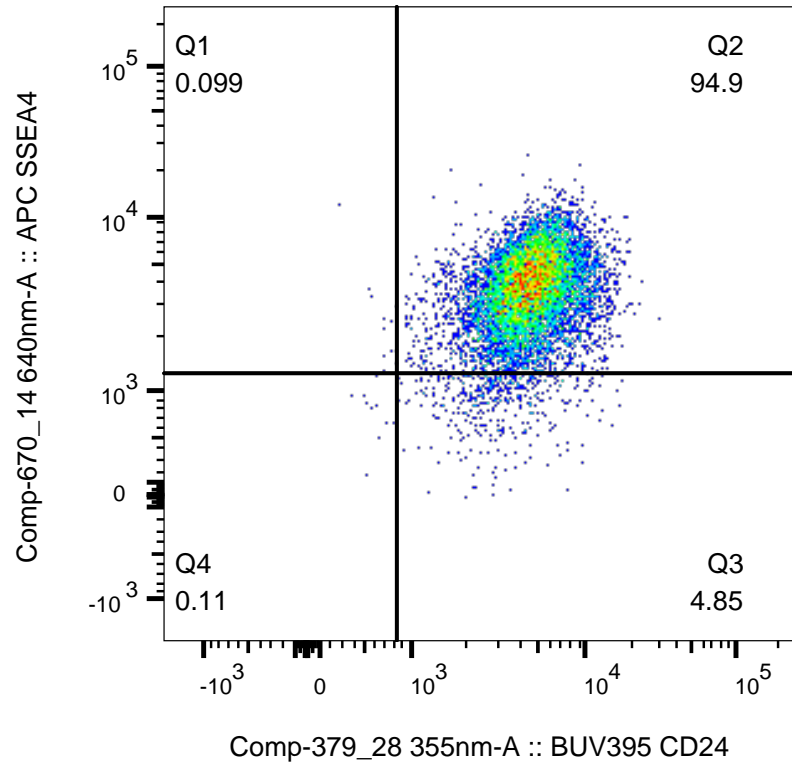

Specimen\_001\_Primer Plus UNC Rep2\_004.fcs  
Live Human  
9077

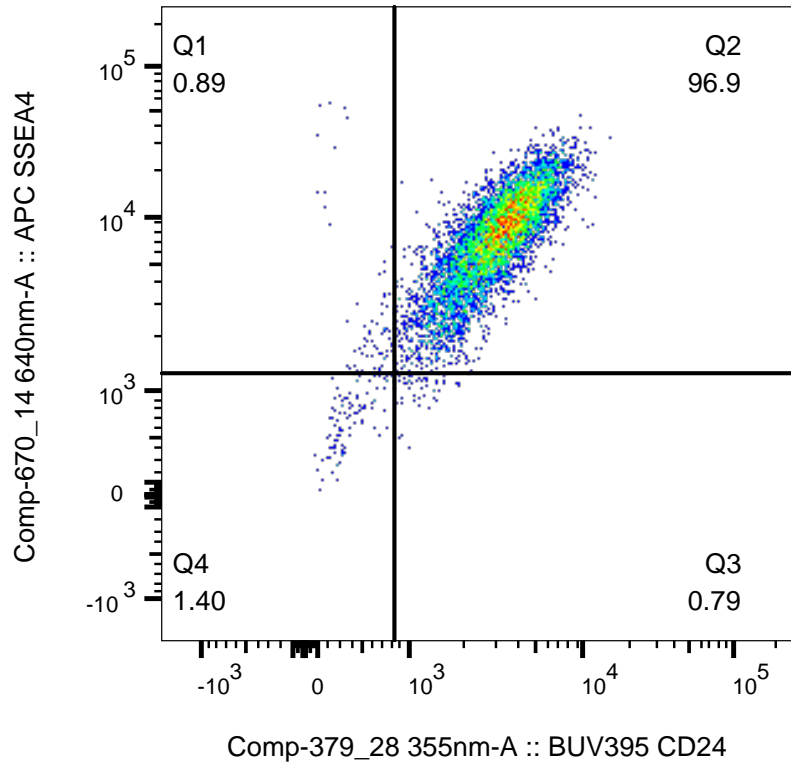

Specimen\_001\_Primer Plus No UNC Rep3\_005.fcs  
Live Human  
6930



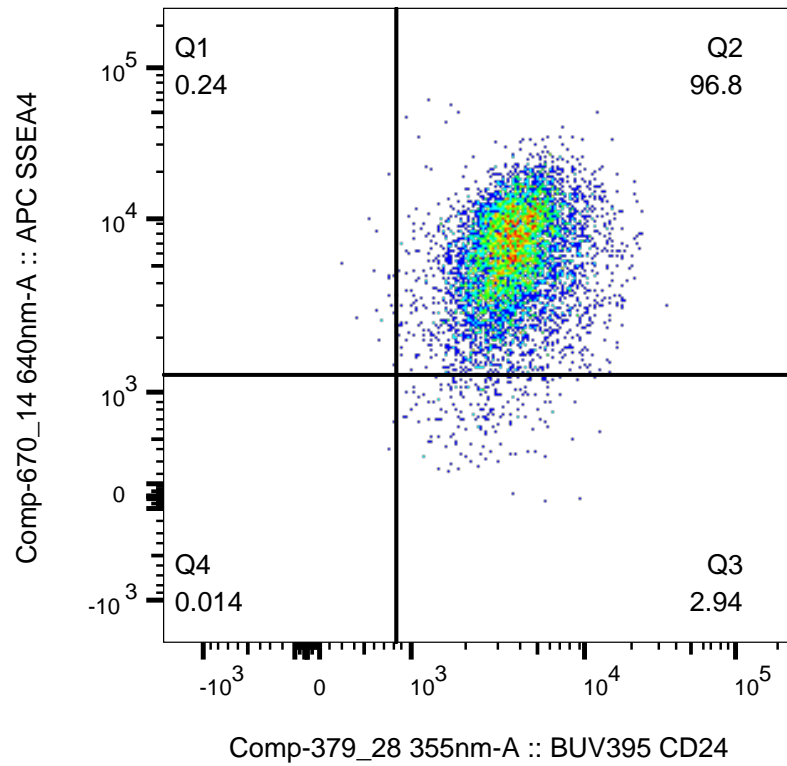

Specimen\_001\_Primed Plus UNC Rep3\_006.fcs  
Live Human  
6941

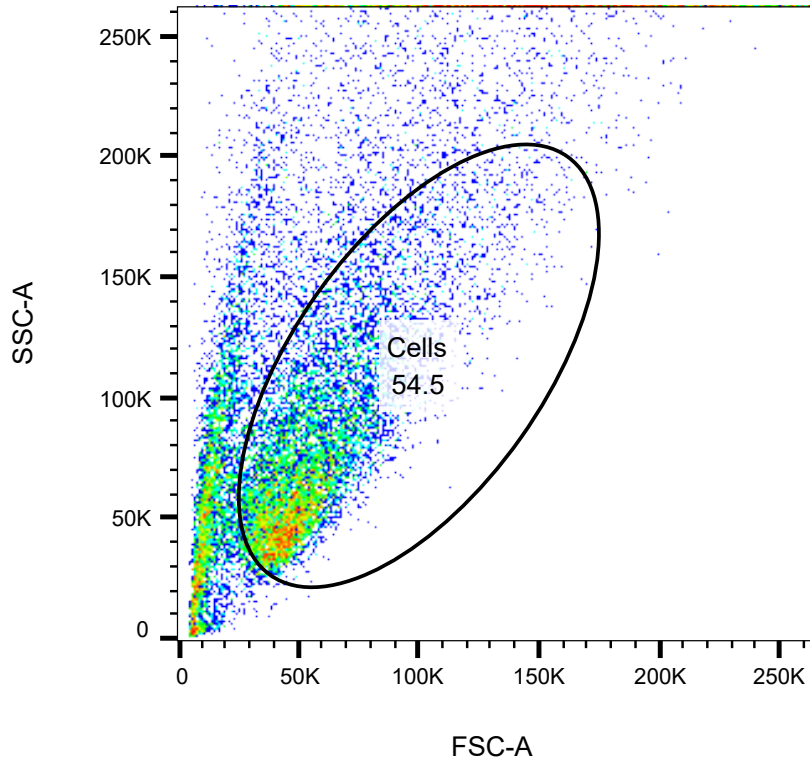

Specimen\_001\_Naive No UNC Rep1\_002.fcs  
Ungated  
20000

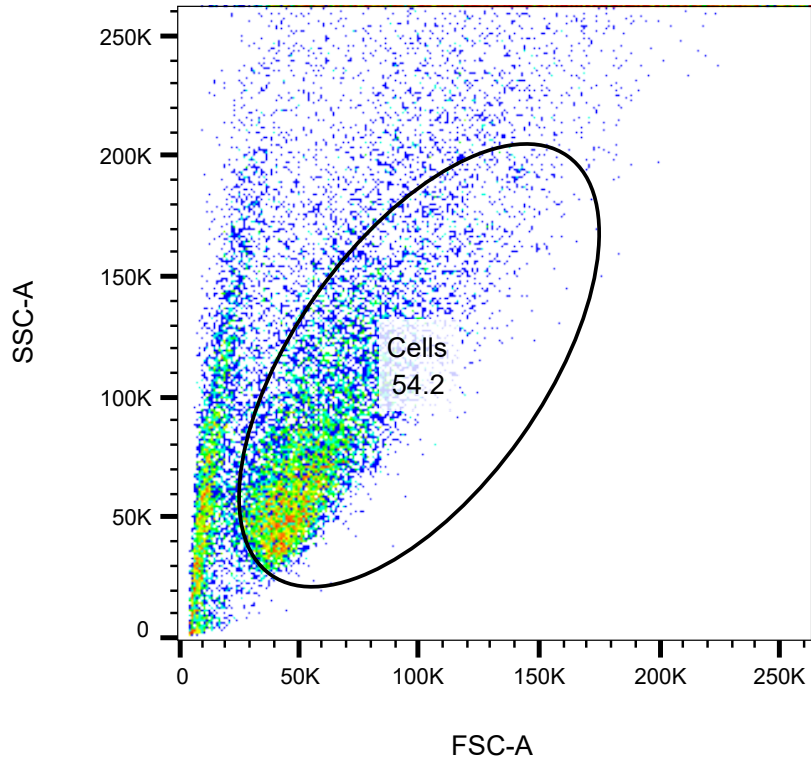

Specimen\_001\_Naive with UNC Rep1\_004.fcs  
Ungated  
20000

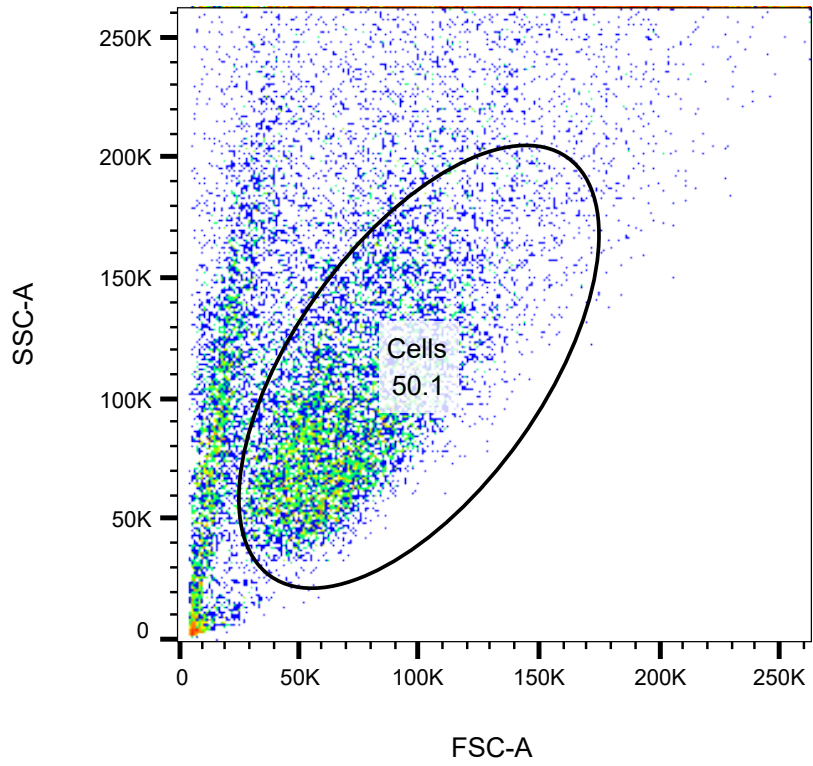

Specimen\_001\_Naive No UNC Rep2\_001.fcs  
Ungated  
20000

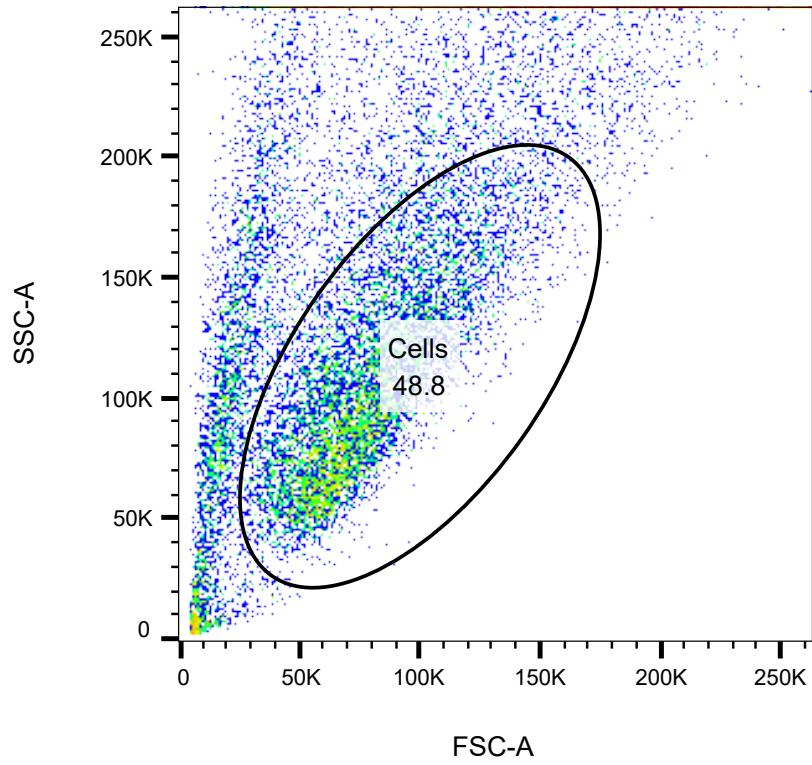

Specimen\_001\_Naive with UNC Rep2\_002.fcs  
Ungated  
20000

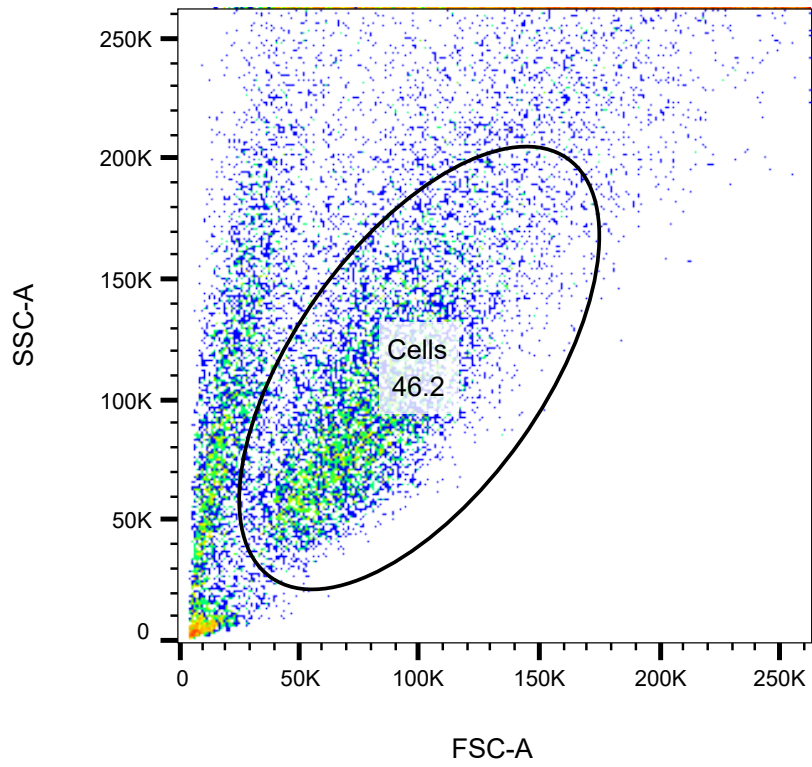

Specimen\_001\_Naive No UNC Rep3\_003.fcs  
Ungated  
20000

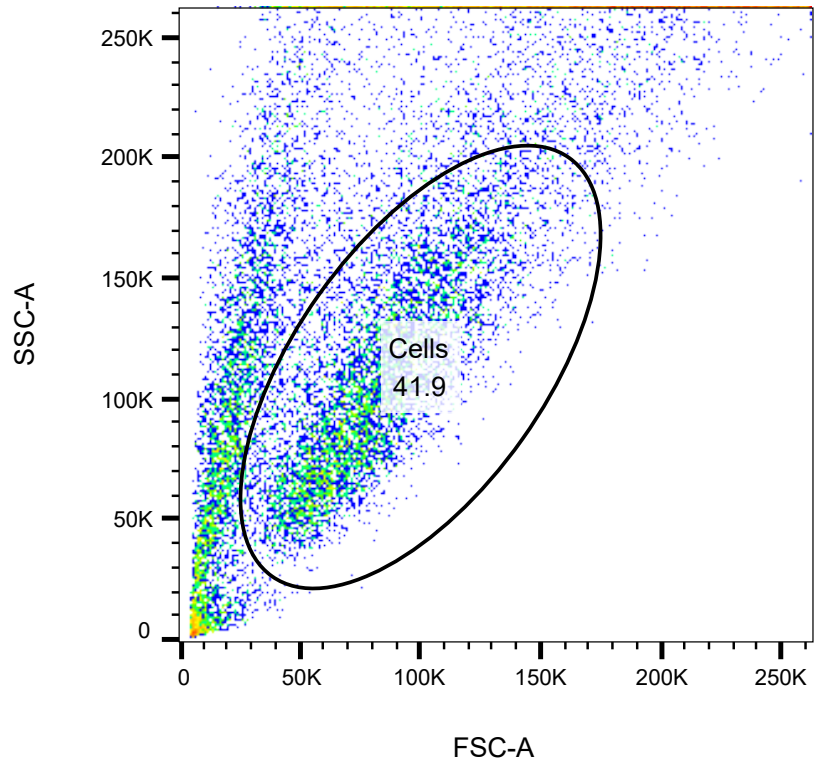

Specimen\_001\_Naive with UNC Rep3\_004.fcs  
Ungated  
20000

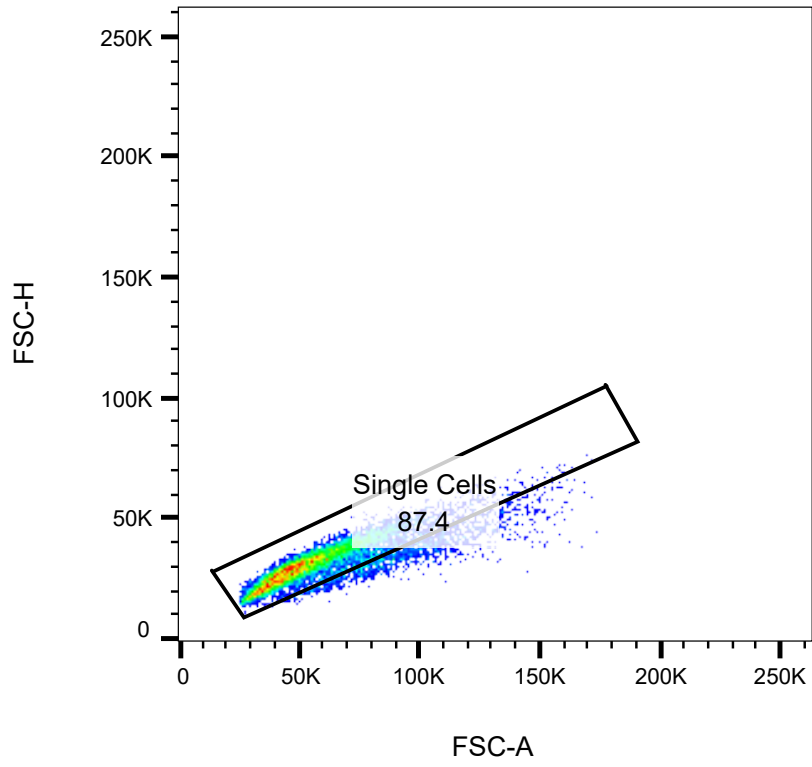

Specimen\_001\_Naive No UNC Rep1\_002.fcs  
Cells  
10902



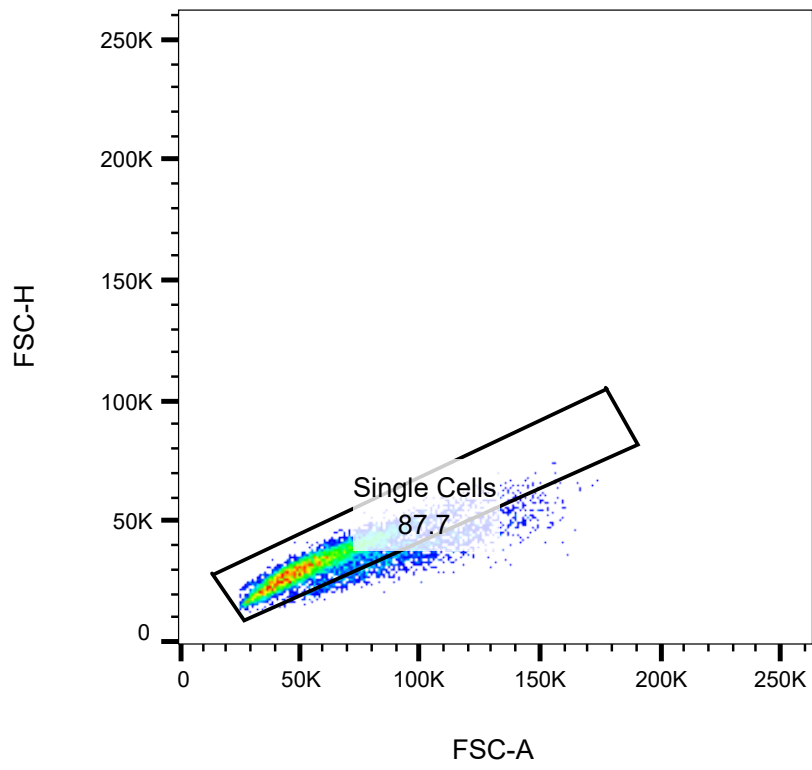

Specimen\_001\_Naive with UNC Rep1\_004.fcs  
Cells  
10838

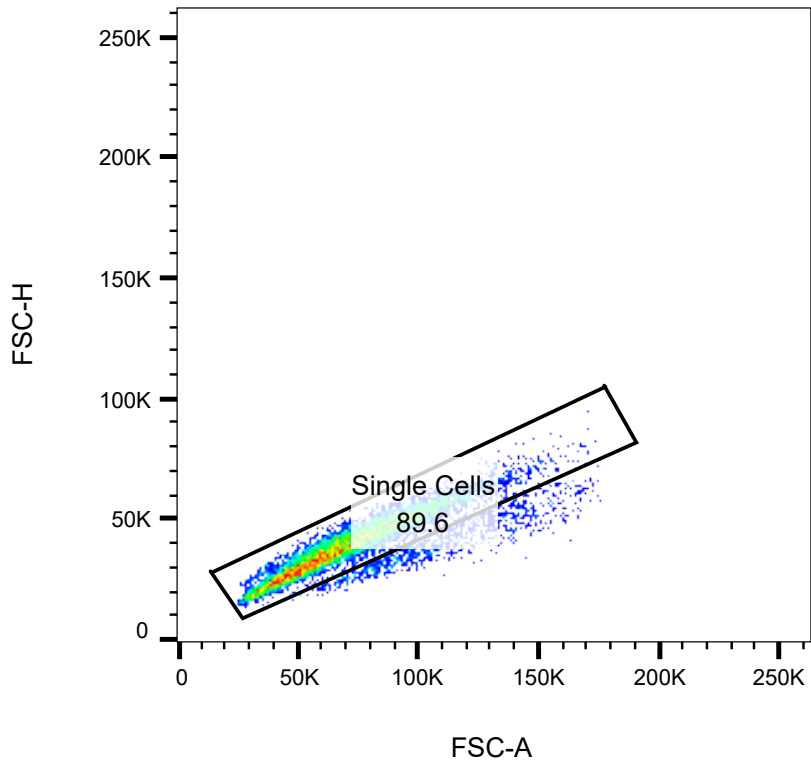

Specimen\_001\_Naive No UNC Rep2\_001.fcs  
Cells  
10029

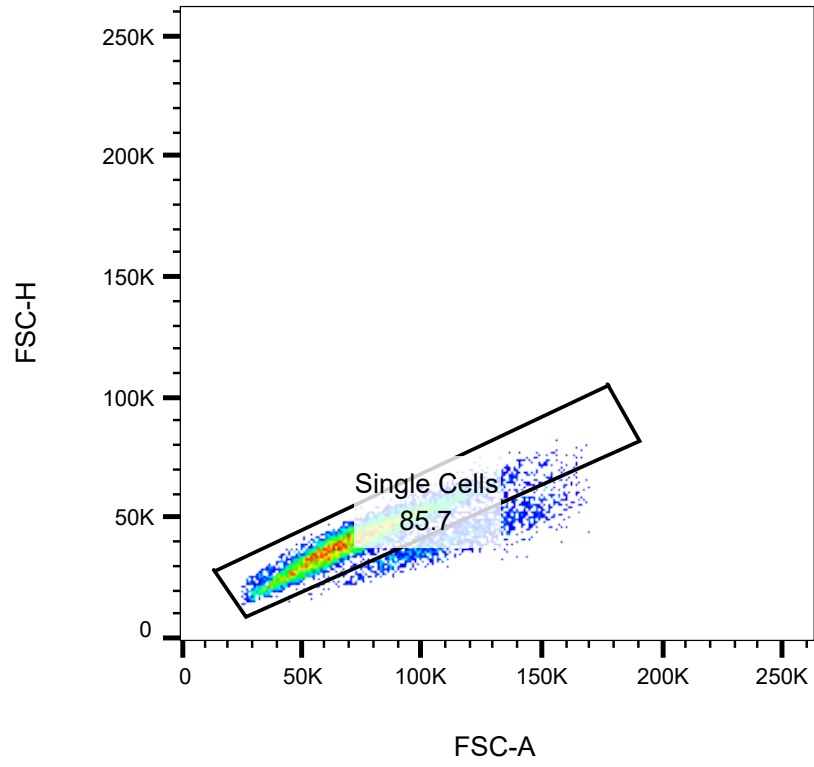

Specimen\_001\_Naive with UNC Rep2\_002.fcs  
Cells  
9765

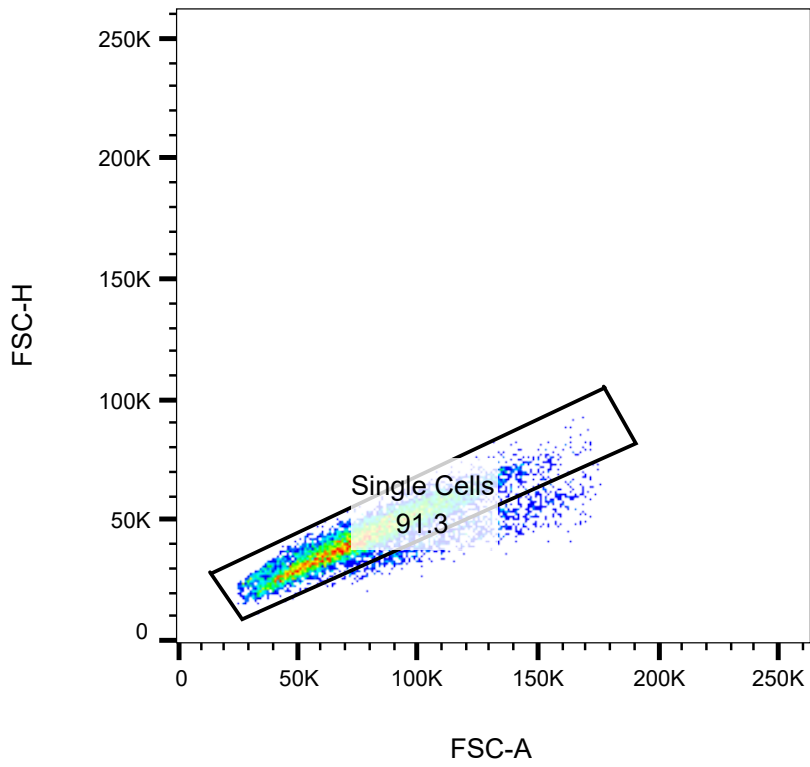

Specimen\_001\_Naive No UNC Rep3\_003.fcs  
Cells  
9243

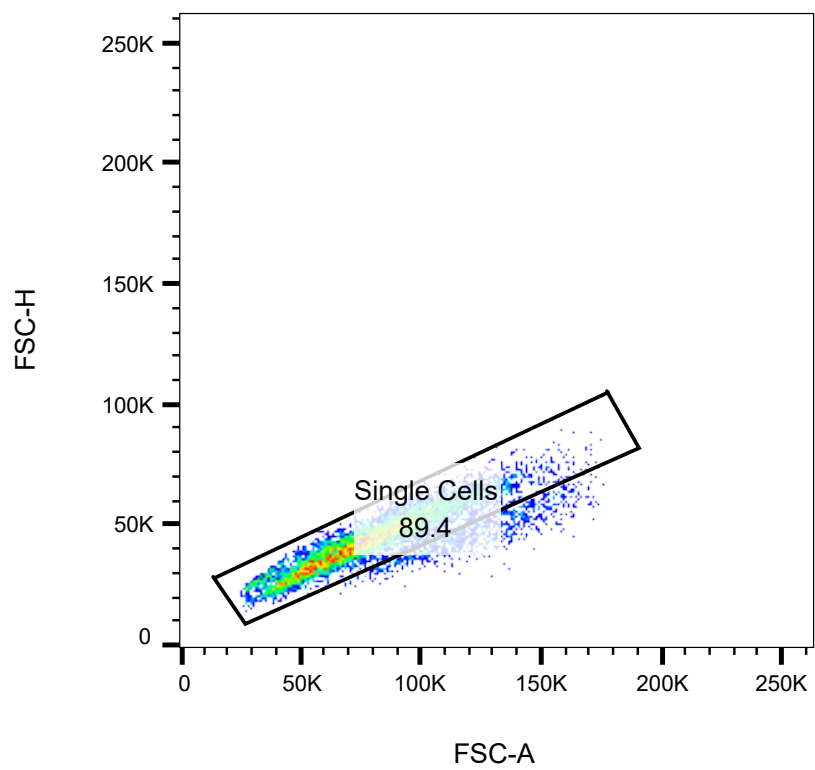

Specimen\_001\_Naive with UNC Rep3\_004.fcs  
Cells  
8383

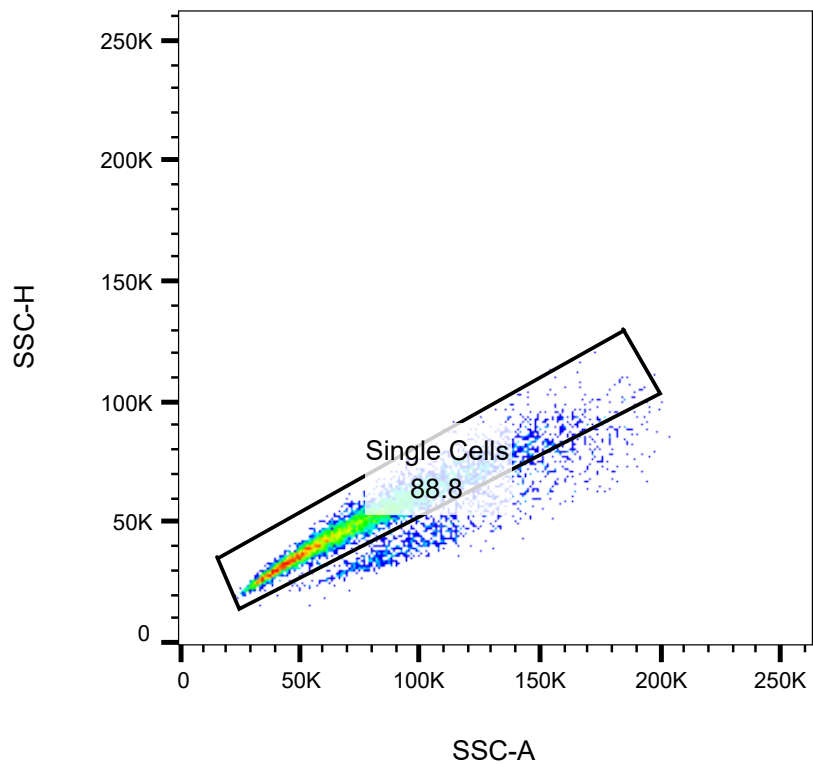

Specimen\_001\_Naive No UNC Rep1\_002.fcs  
Single Cells  
9533

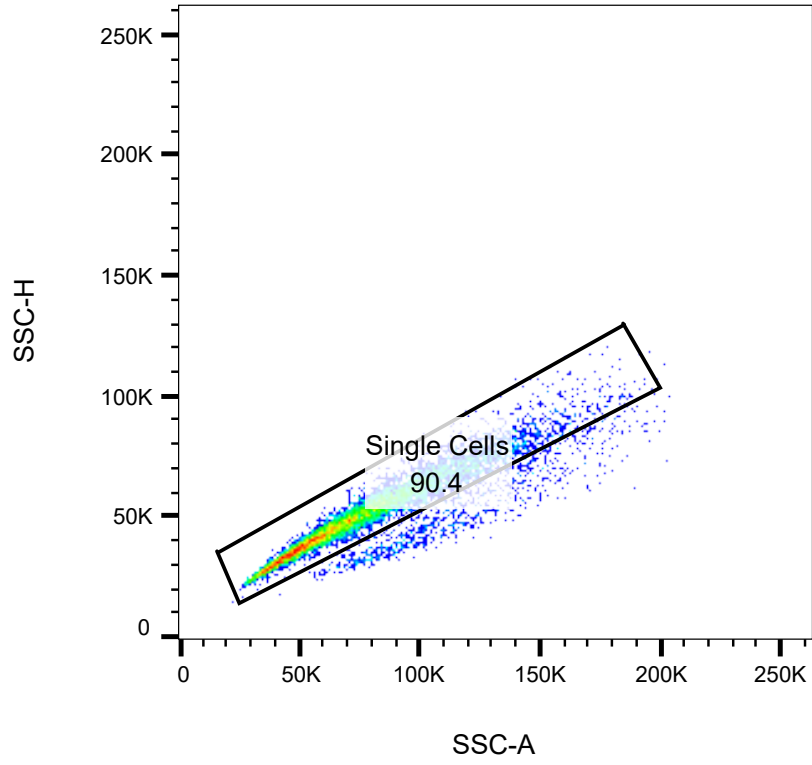

Specimen\_001\_Naive with UNC Rep1\_004.fcs  
Single Cells  
9502

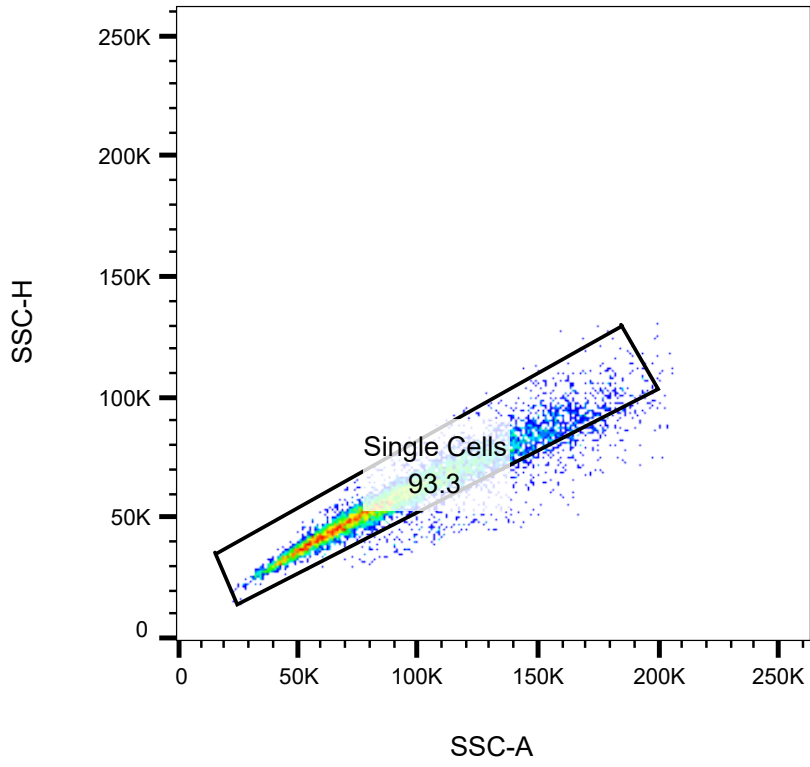

Specimen\_001\_Naive No UNC Rep2\_001.fcs  
Single Cells  
8990



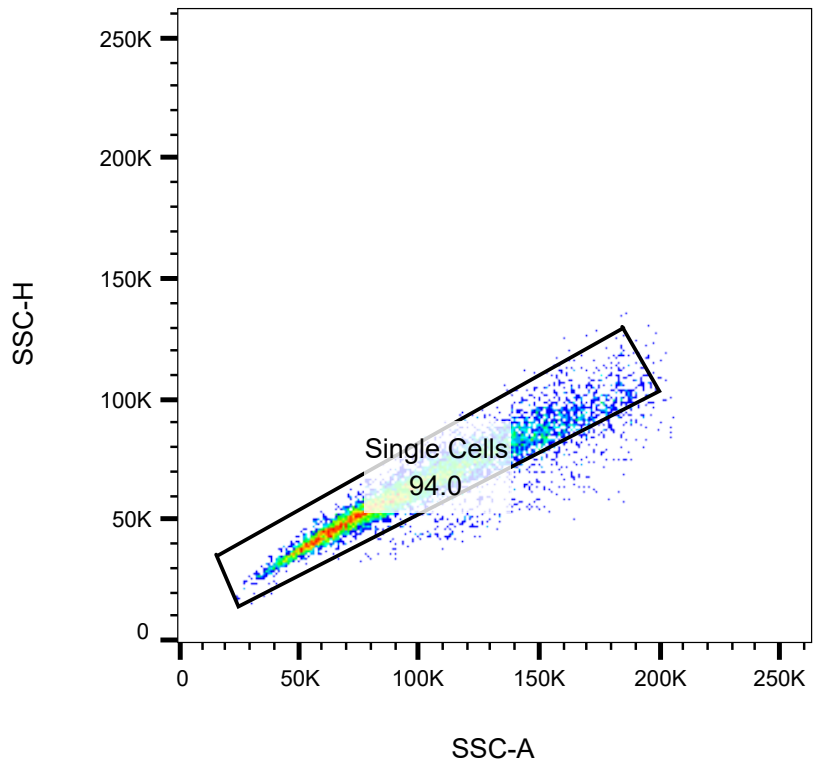

Specimen\_001\_Naive with UNC Rep2\_002.fcs  
Single Cells  
8369

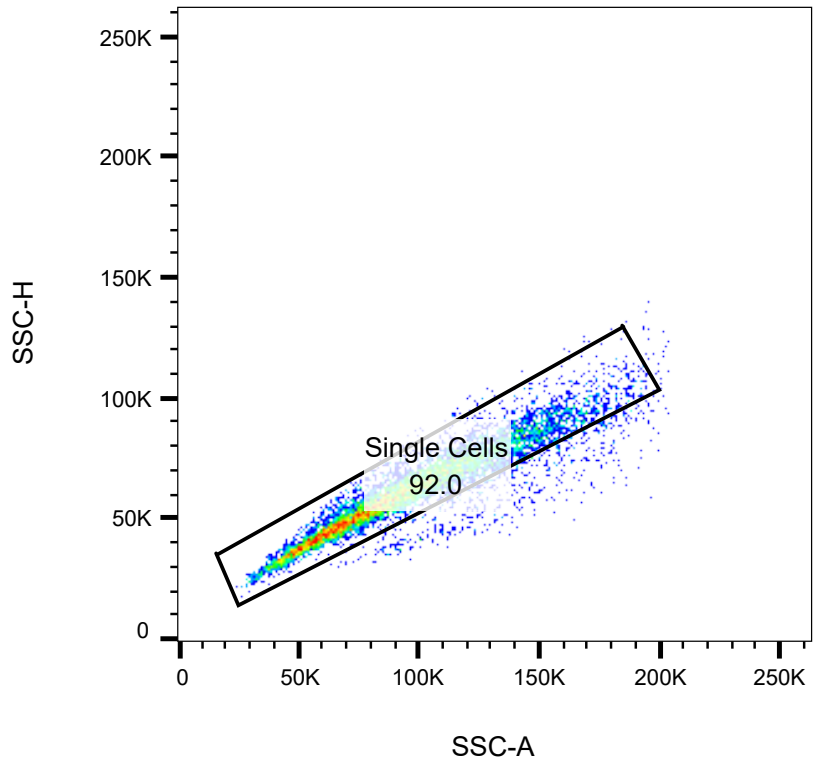

Specimen\_001\_Naive No UNC Rep3\_003.fcs  
Single Cells  
8435

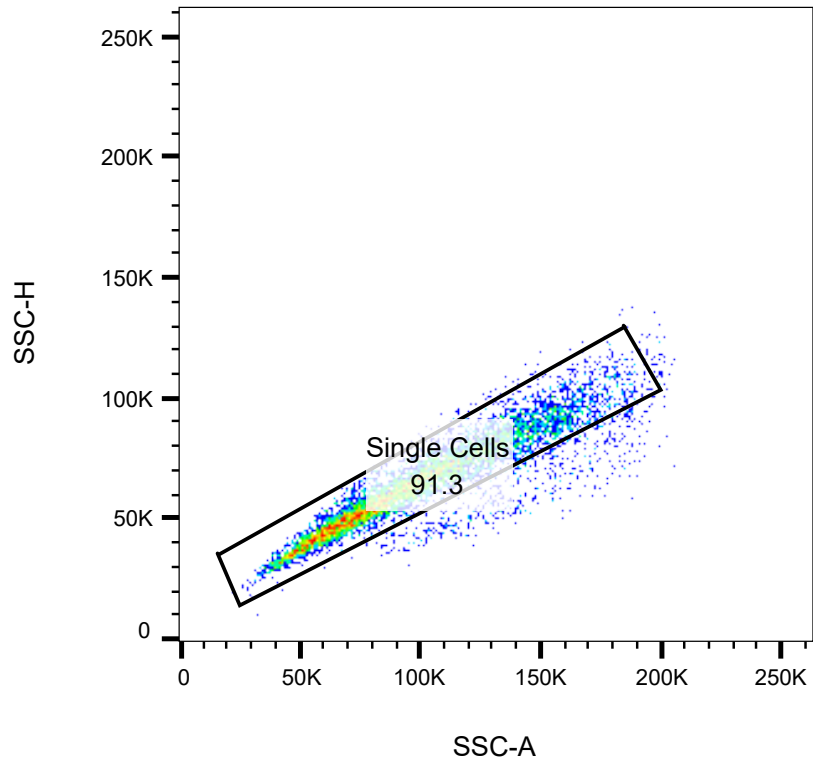

Specimen\_001\_Naive with UNC Rep3\_004.fcs  
Single Cells  
7498

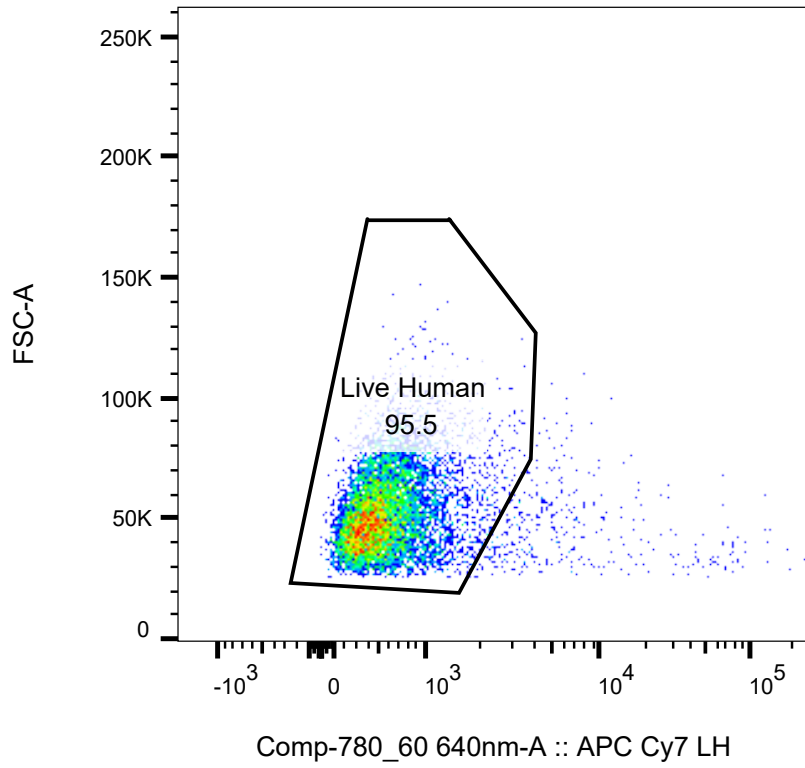

Specimen\_001\_Naive No UNC Rep1\_002.fcs  
Single Cells  
8464

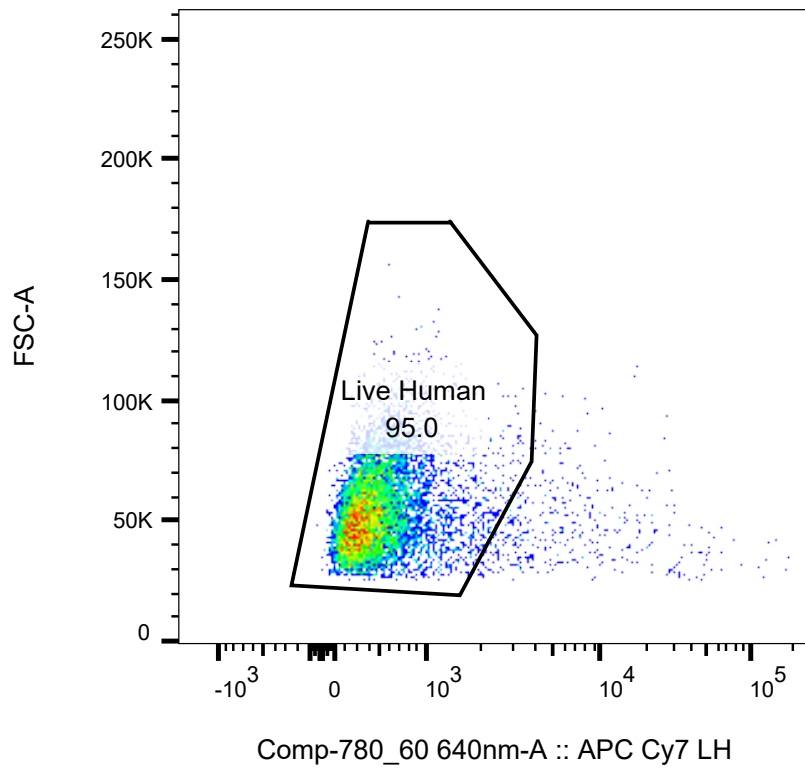

Specimen\_001\_Naive with UNC Rep1\_004.fcs  
Single Cells  
8588

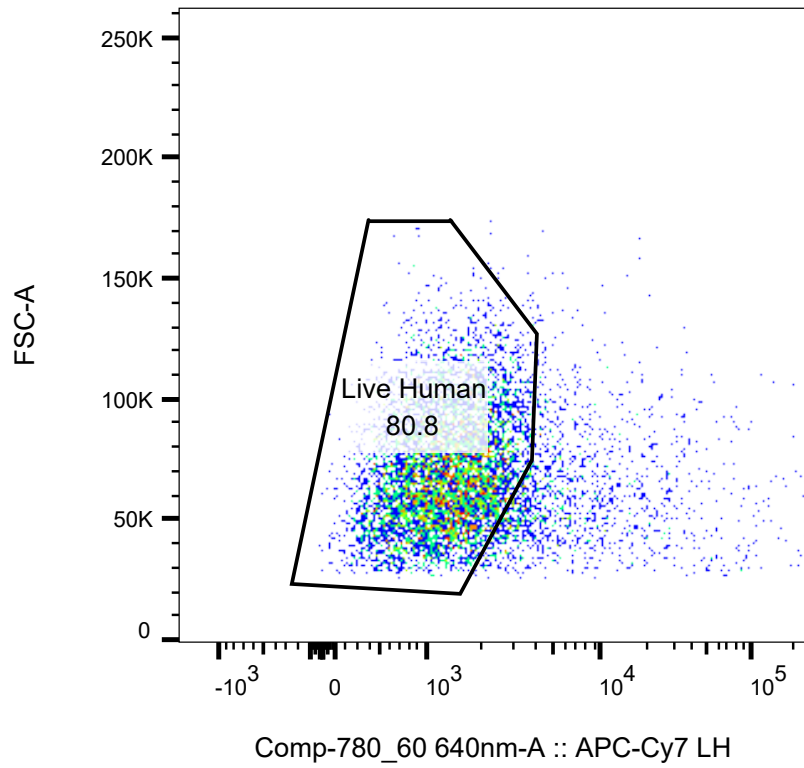

Specimen\_001\_Naive No UNC Rep2\_001.fcs  
Single Cells  
8391

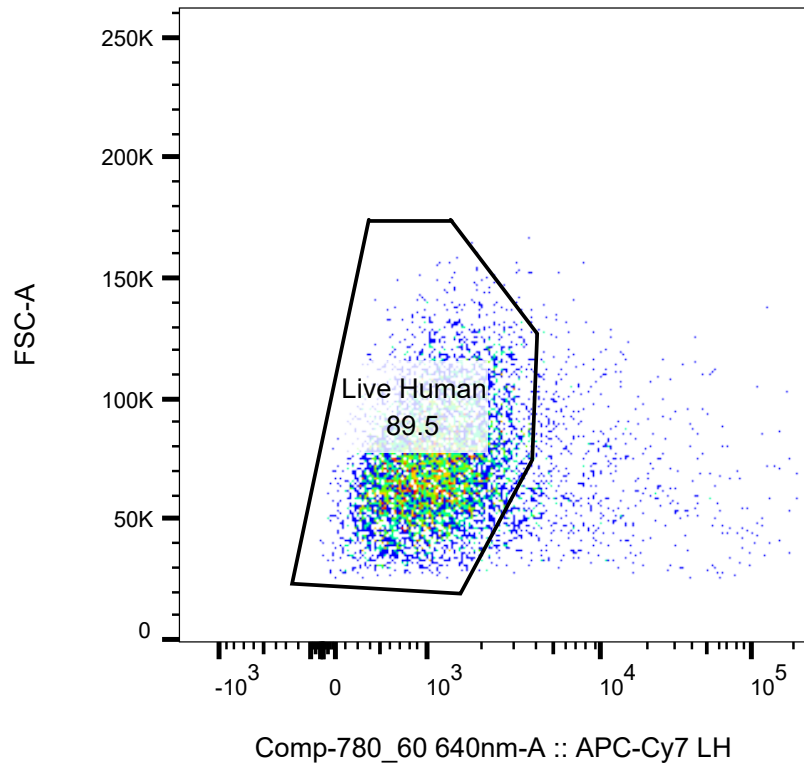

Specimen\_001\_Naive with UNC Rep2\_002.fcs  
Single Cells  
7871

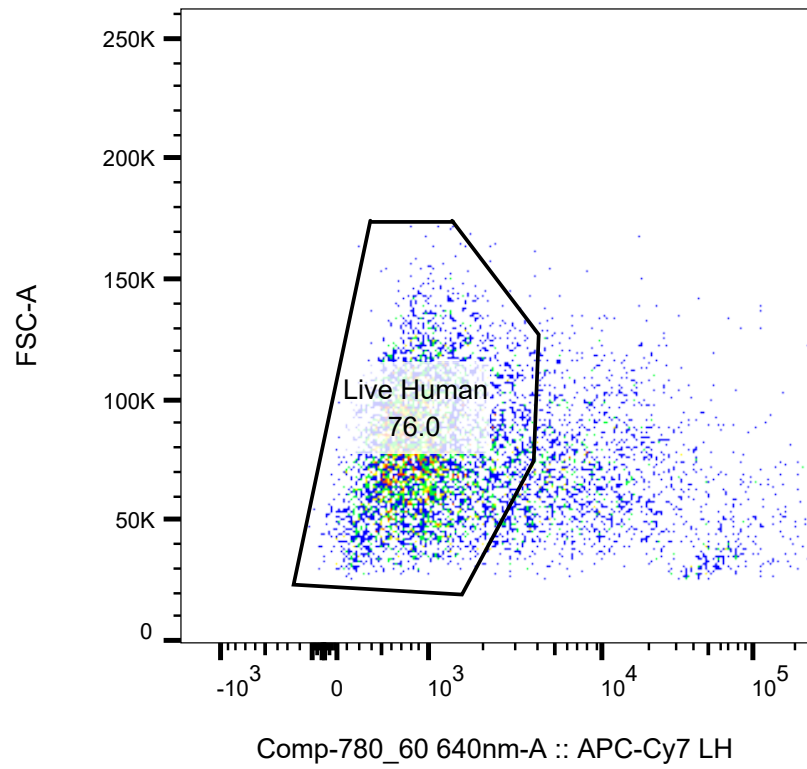

Specimen\_001\_Naive No UNC Rep3\_003.fcs  
Single Cells  
7764



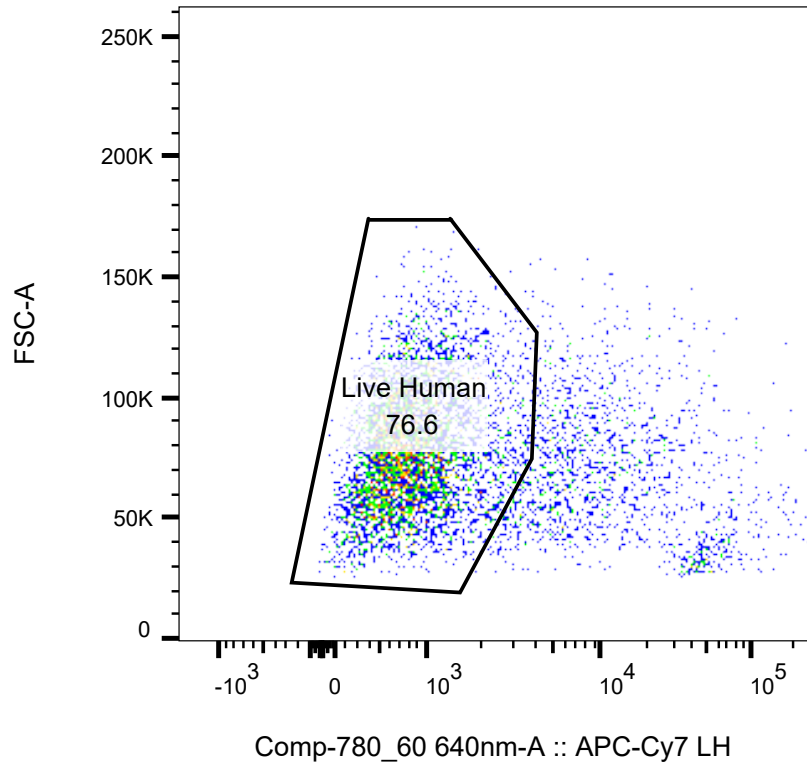

Specimen\_001\_Naive with UNC Rep3\_004.fcs  
Single Cells  
6842

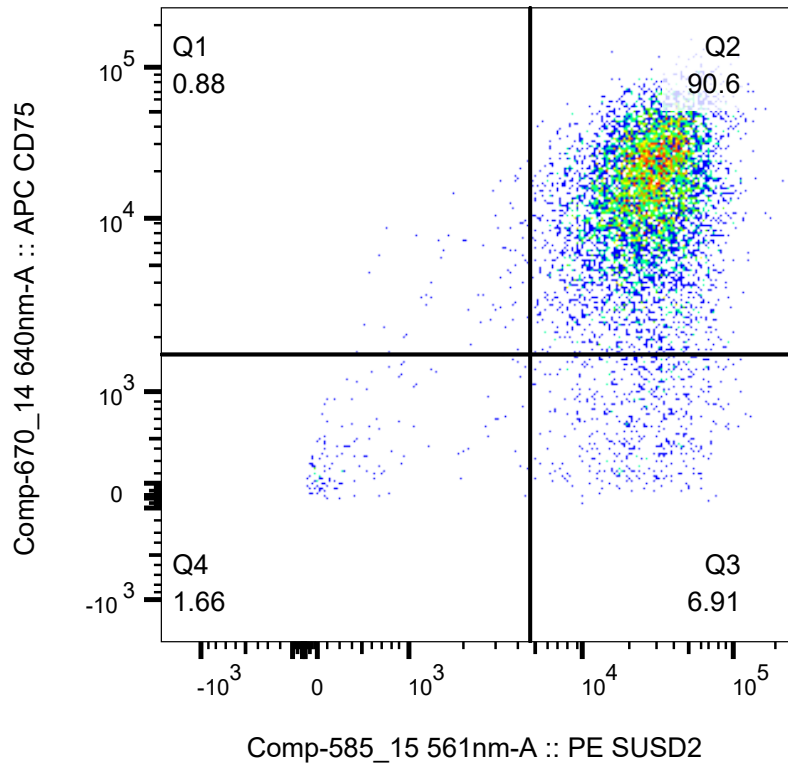

Specimen\_001\_Naive No UNC Rep1\_002.fcs  
Live Human  
8086

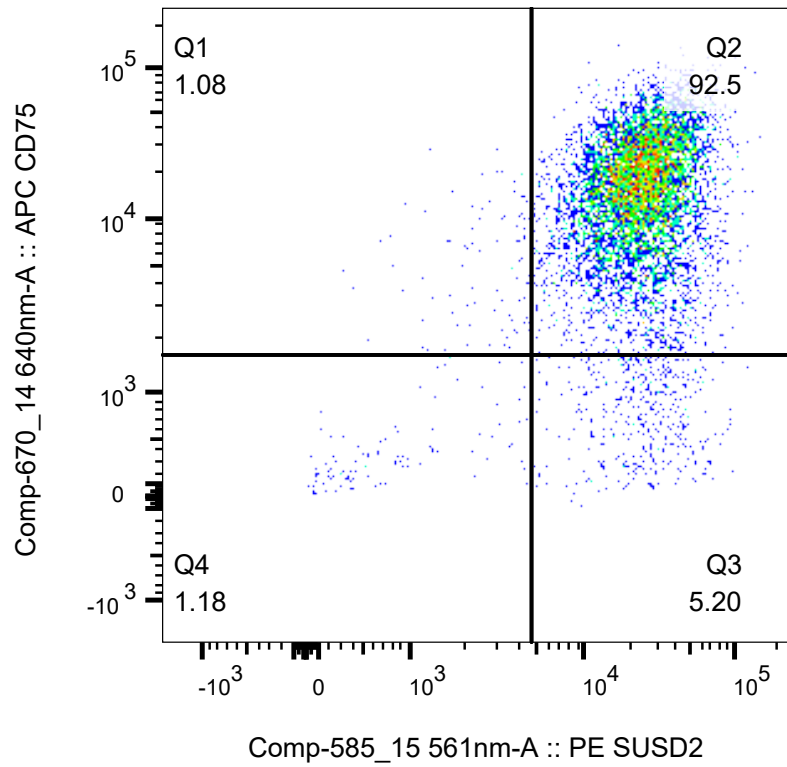

Specimen\_001\_Naive with UNC Rep1\_004.fcs  
Live Human  
8158

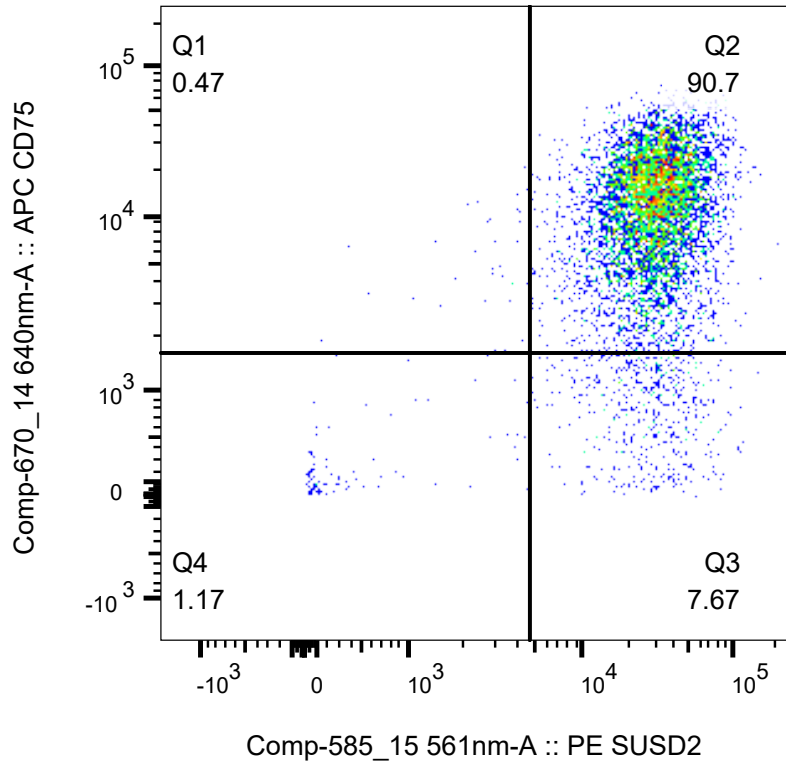

Specimen\_001\_Naive No UNC Rep2\_001.fcs  
Live Human  
6778

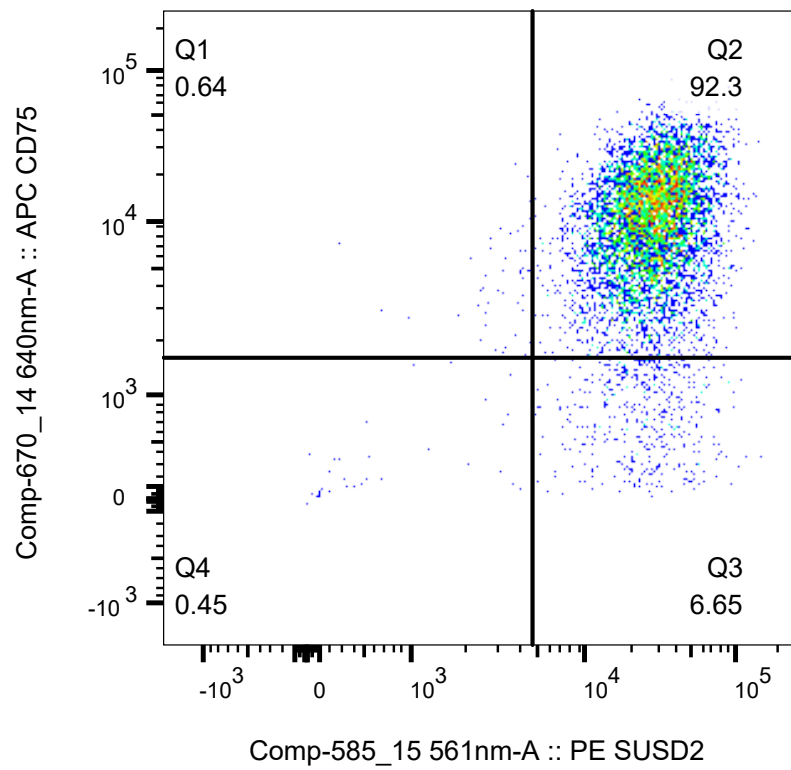

Specimen\_001\_Naive with UNC Rep2\_002.fcs  
Live Human  
7041

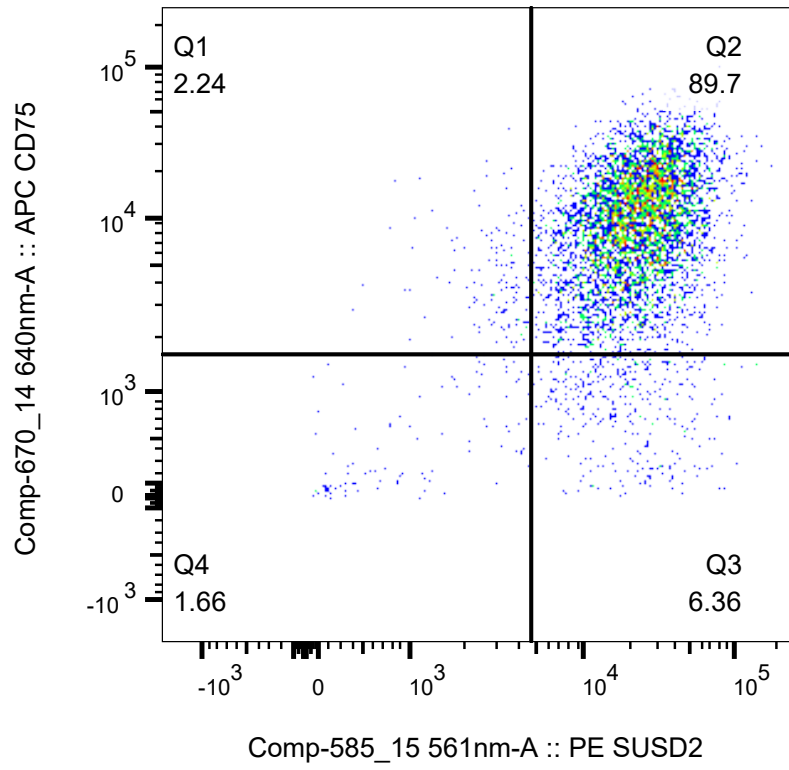

Specimen\_001\_Naive No UNC Rep3\_003.fcs  
Live Human  
5898

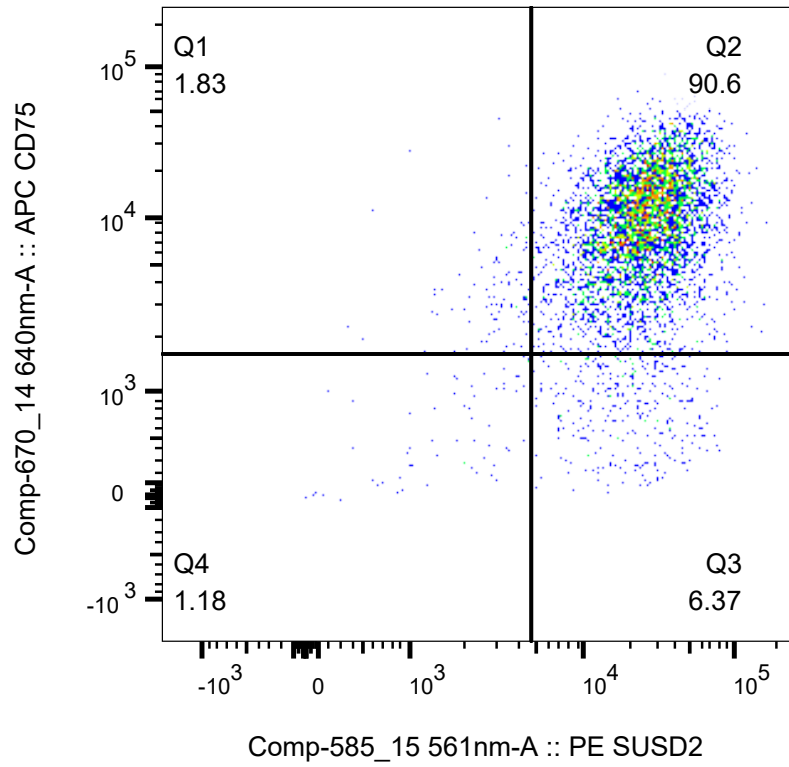

Specimen\_001\_Naive with UNC Rep3\_004.fcs  
Live Human  
5240

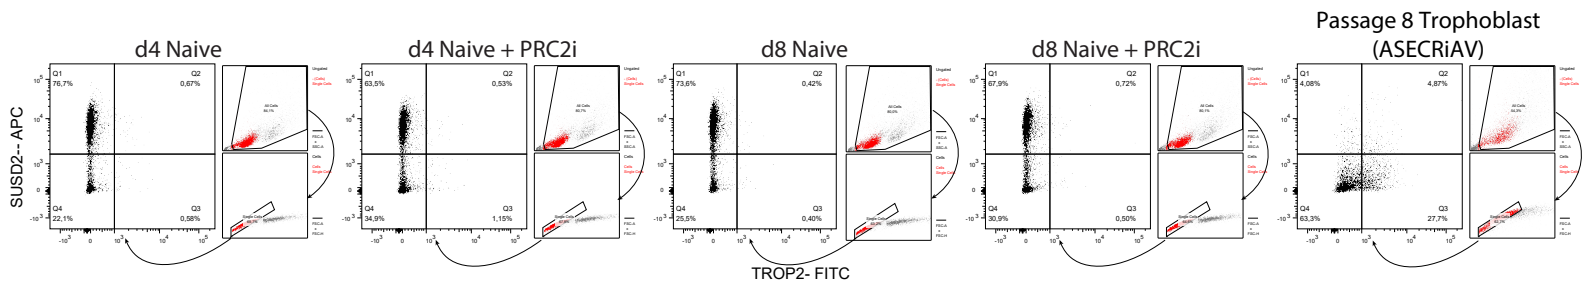

Gating strategy: Forward scatter area (FSC-A) and side scatter area (SSC-A) were used to select for cells from debris (gate labeled all cells, top right). Then FSC-A and forward scatter height (FSC-H) were used to separate single cells from multiplets (gate labeled as single cells, bottom right). The gated single cells were then used in the main plot.

## Extended Data Figure 5d



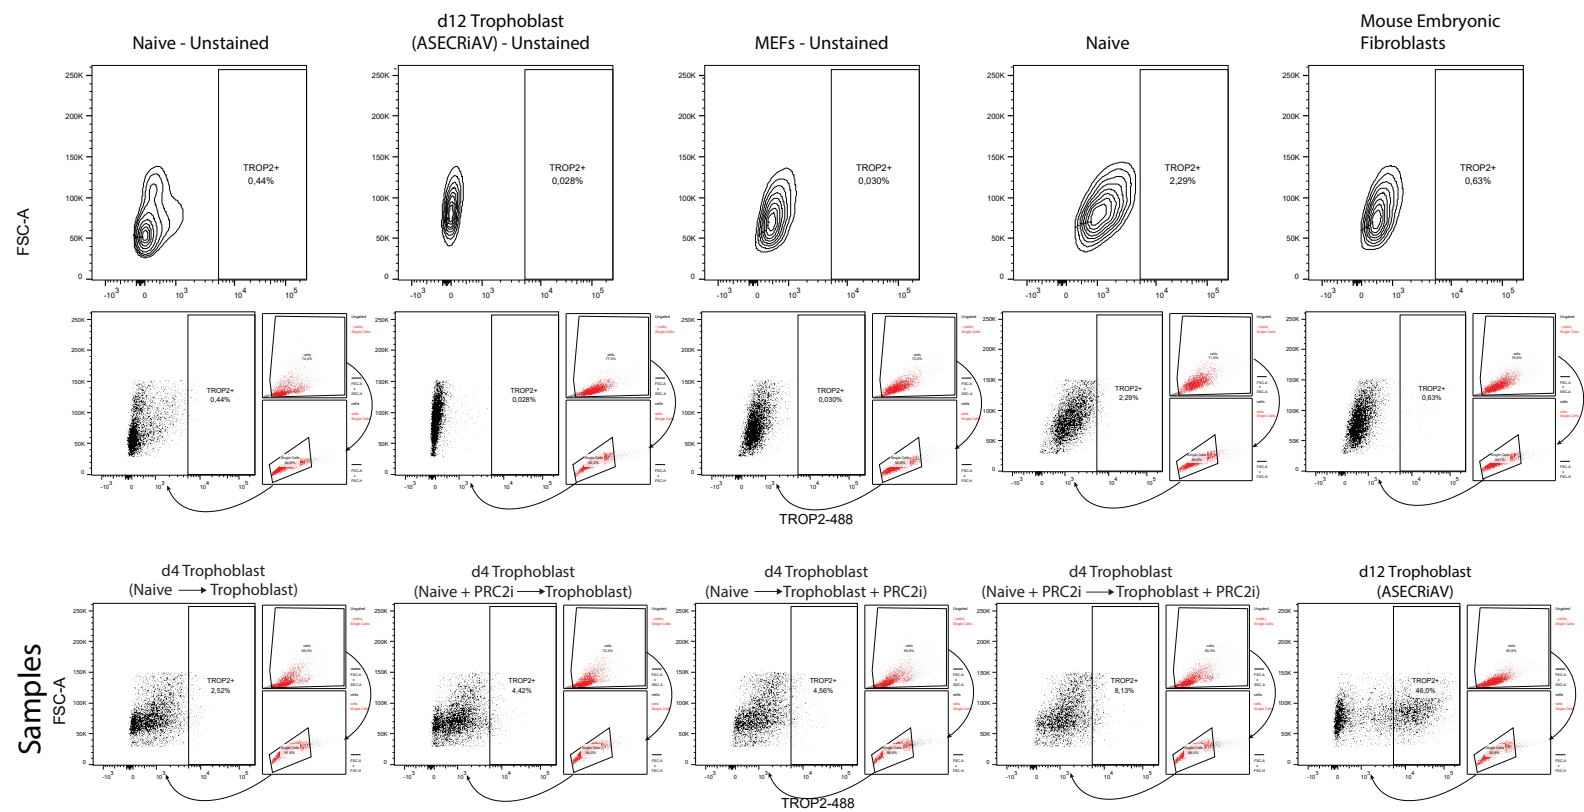

Gating strategy: Forward scatter area (FSC-A) and side scatter area (SSC-A) were used to select for cells from debris (gate labeled all cells, top right). Then FSC-A and forward scatter height (FSC-H) were used to separate single cells from multiplets (gate labeled as single cells, bottom right). The gated single cells were then used in the main plot.

Extended Data Figure 5i

### Experiment 1:

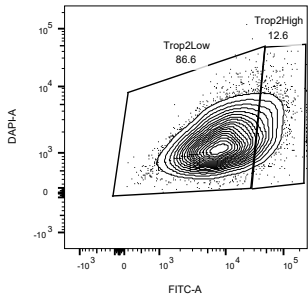

36hrs\_blastoid\_PRC1\_NoPretreatment\_withoutPRCI\_004.fcs  
Single Cells  
9769

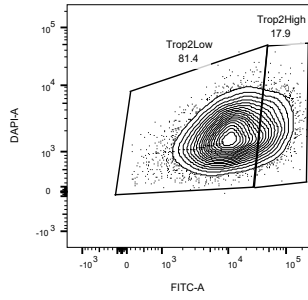

36hrs\_blastoid\_PRC1\_PretreatedwithPRCI\_002.fcs  
Single Cells  
10013

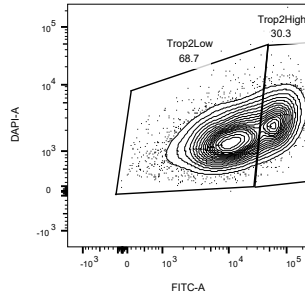

60hrs\_blastoid\_PRC1\_001\_NoPretreatment\_withoutPRCI\_003.fcs  
Single Cells  
8106

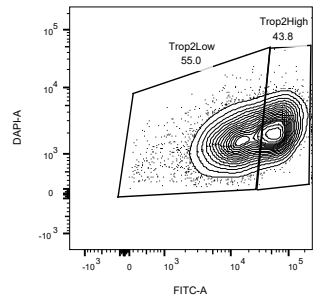

60hrs\_blastoid\_PRC1\_001\_Pretreated\_withPRCI\_005.fcs  
Single Cells  
9364

### Experiment 2:

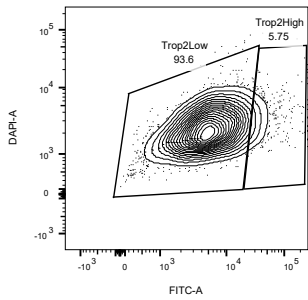

Specimen\_001\_36hours\_Control\_002.fcs  
Single Cells  
5580

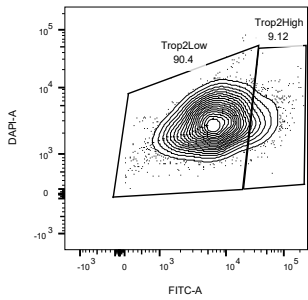

Specimen\_001\_36hours\_PRC2\_003.fcs  
Single Cells  
6263

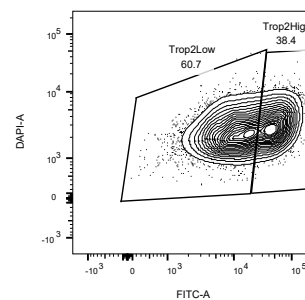

Specimen\_001\_60hours\_PRC2\_003.fcs  
Single Cells  
8276

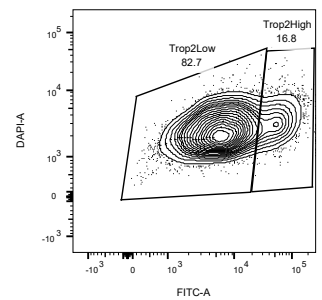

Specimen\_001\_60hours\_WT\_002.fcs  
Single Cells  
8596

### Experiment 3:

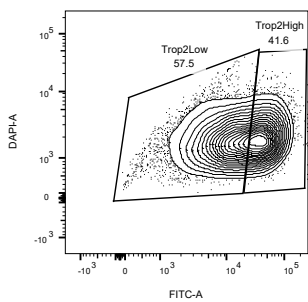

20211211\_60hours\_prc2\_002.fcs  
Single Cells  
11206

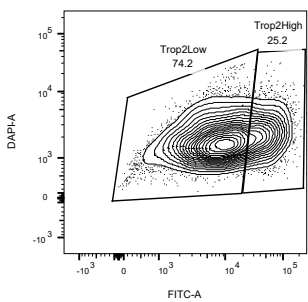

20211211\_60hours\_wt\_001.fcs  
Single Cells  
9500

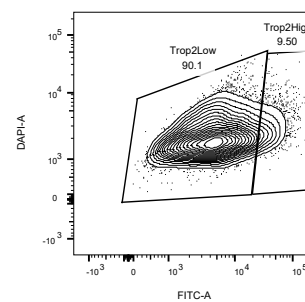

Specimen\_001\_36hours\_wt\_002.fcs  
Single Cells  
9827

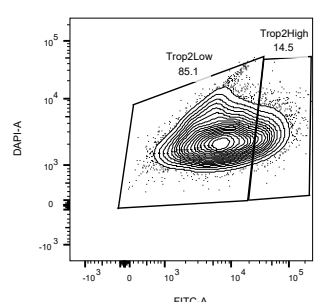

Specimen\_001\_36hours\_prc2\_003.fcs  
Single Cells  
11158
