# Supplementary material for: Integrated multi-omics reveal polycomb repressive complex 2 restricts human trophoblast induction
Source: PubMed Central journal article supplement (PMC9203278; doi:10.1038/s41556-022-00932-w), 2022-06-13
Supplement: 41556_2022_932_MOESM16_ESM.pdf [file 41556_2022_932_MOESM16_ESM.pdf]

# Naive H3K27me3

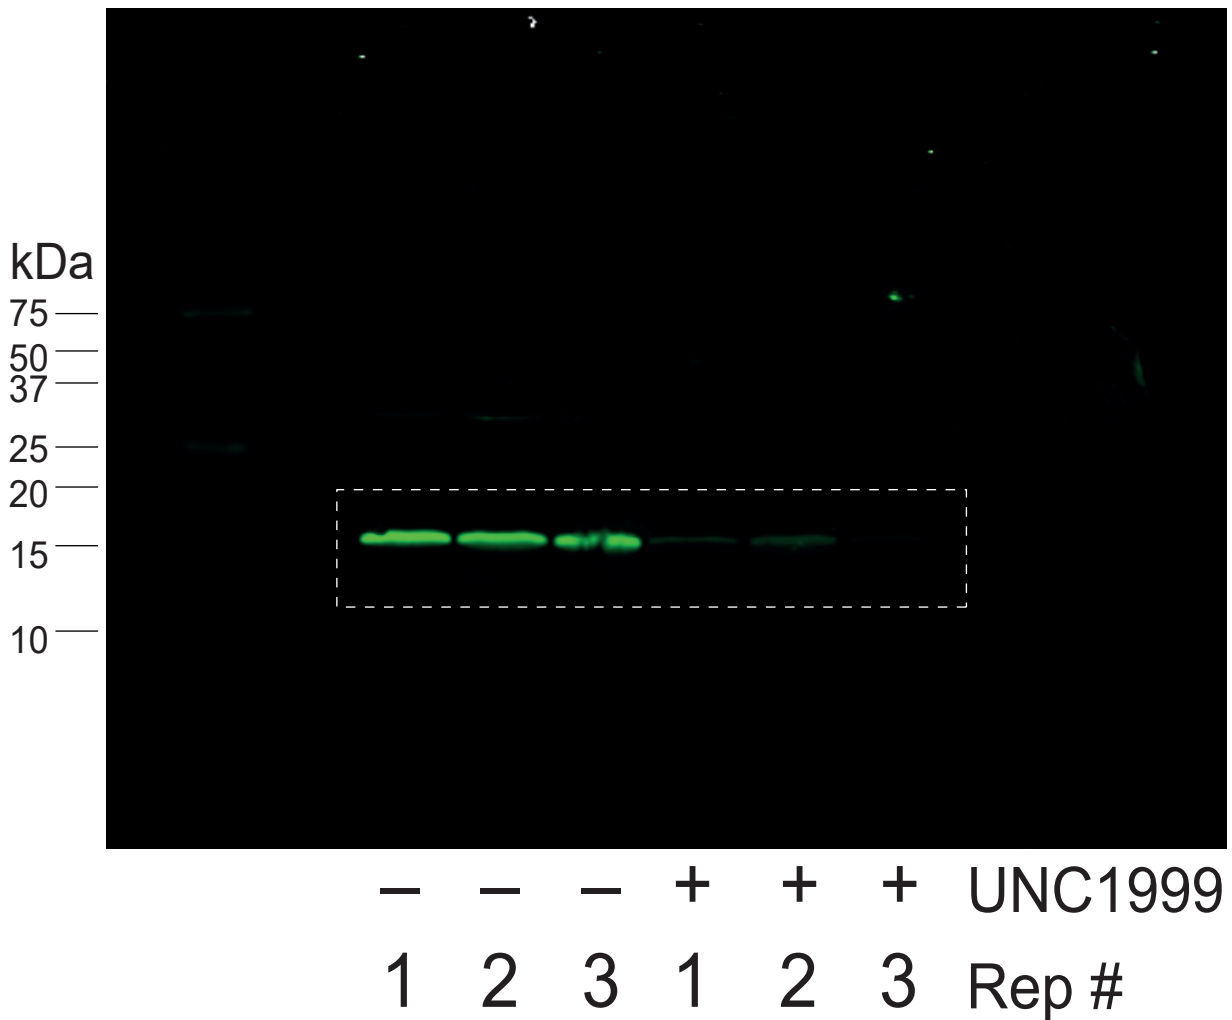

Source Data

Extended Data Figure 4A

# Naive H2B loading control

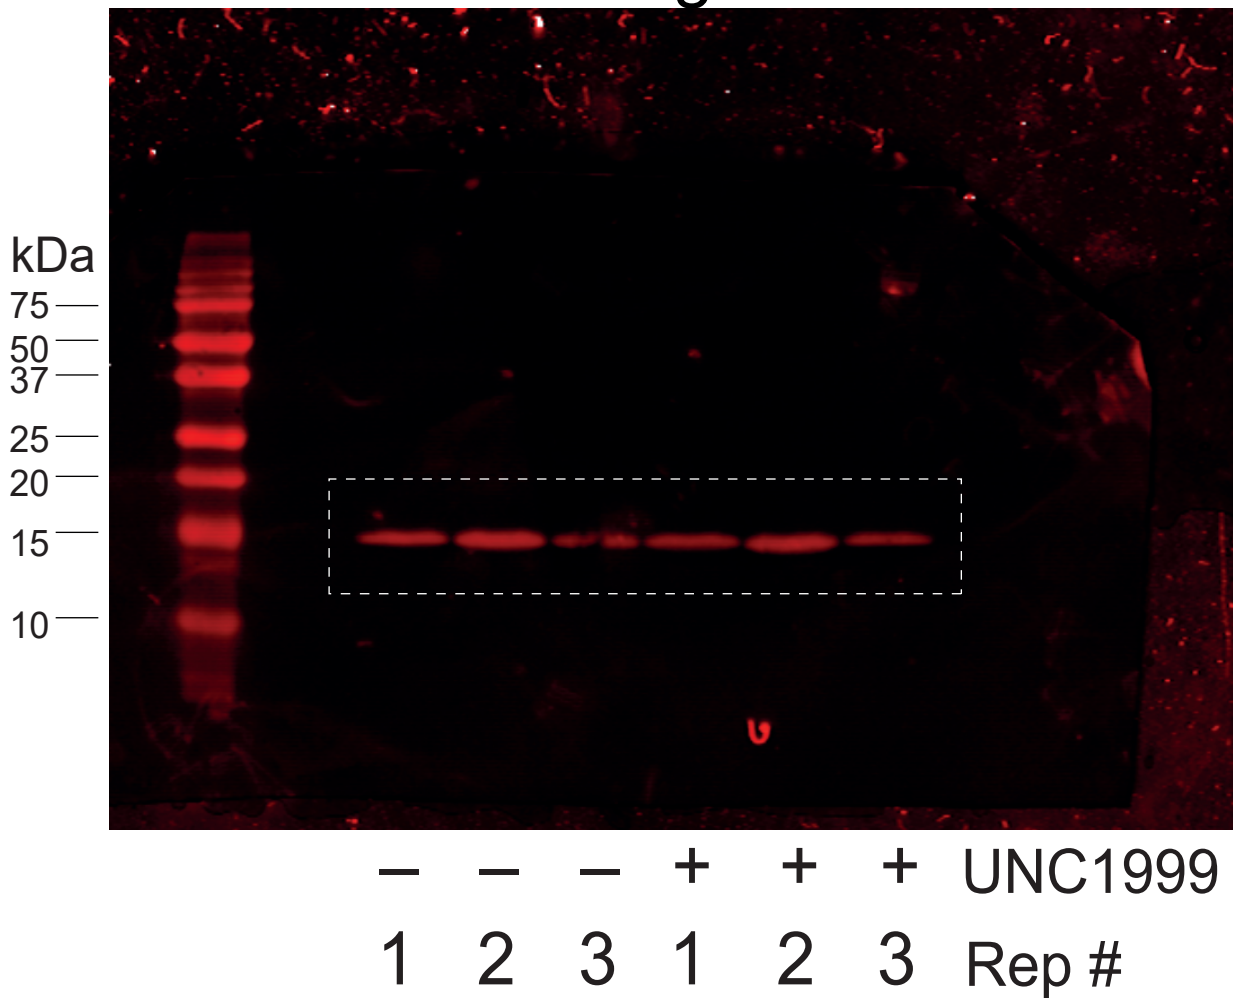

Source Data  
Extended Data Figure 4A

# Primed H3K27me3

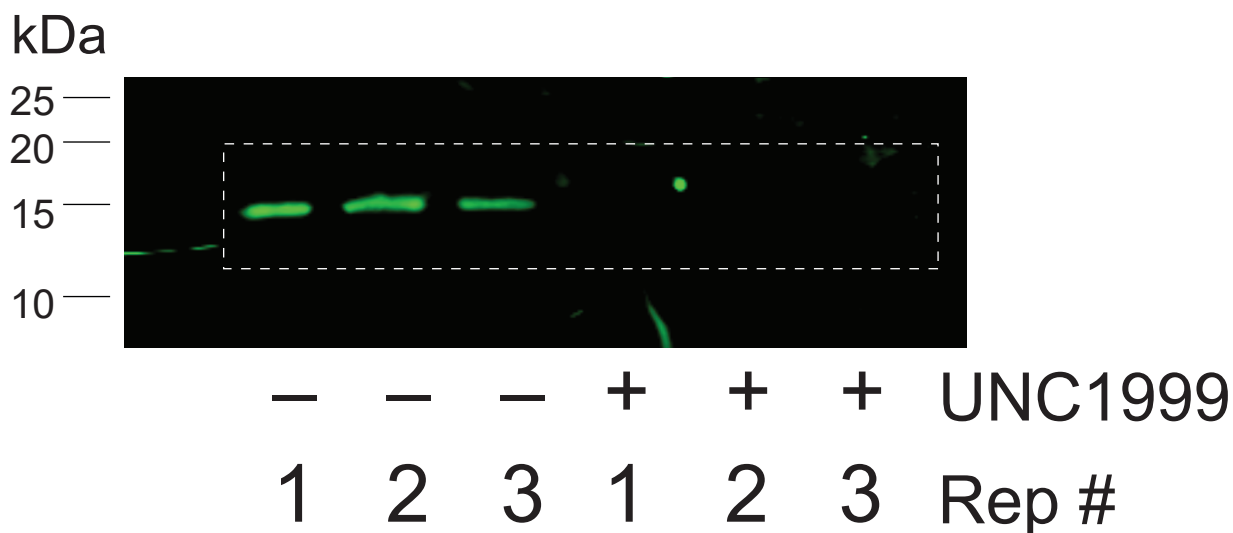

Source Data  
Extended Data Figure 4A

# Primed H2B loading control

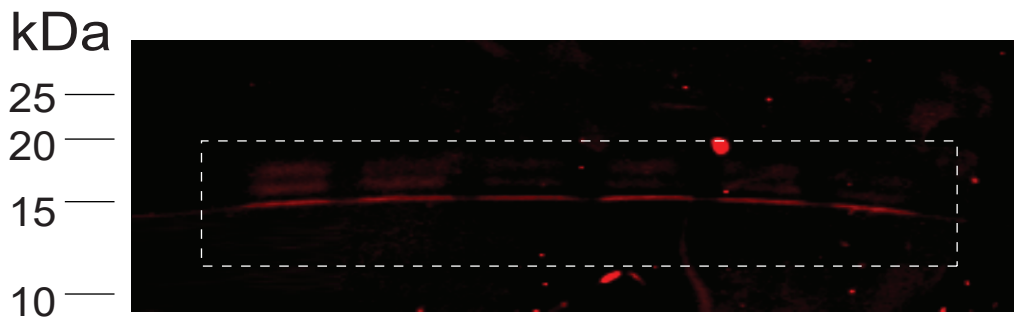

|   |   |   |   |   |   |         |
|---|---|---|---|---|---|---------|
| - | - | - | + | + | + | UNC1999 |
| 1 | 2 | 3 | 1 | 2 | 3 | Rep #   |

Source Data

Extended Data Figure 4A

# Naive H3K27me3

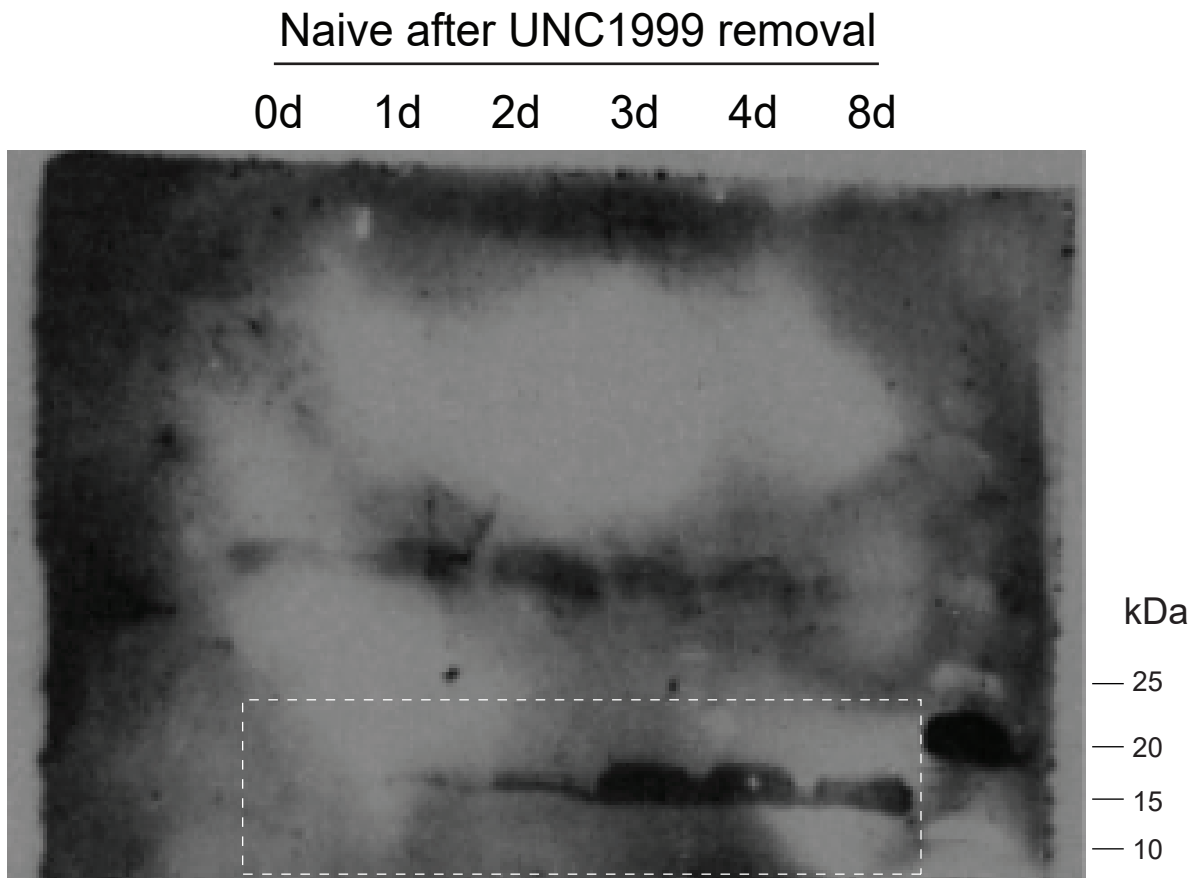

Source Data  
Extended Data Figure 4A

## Naive H2B loading control

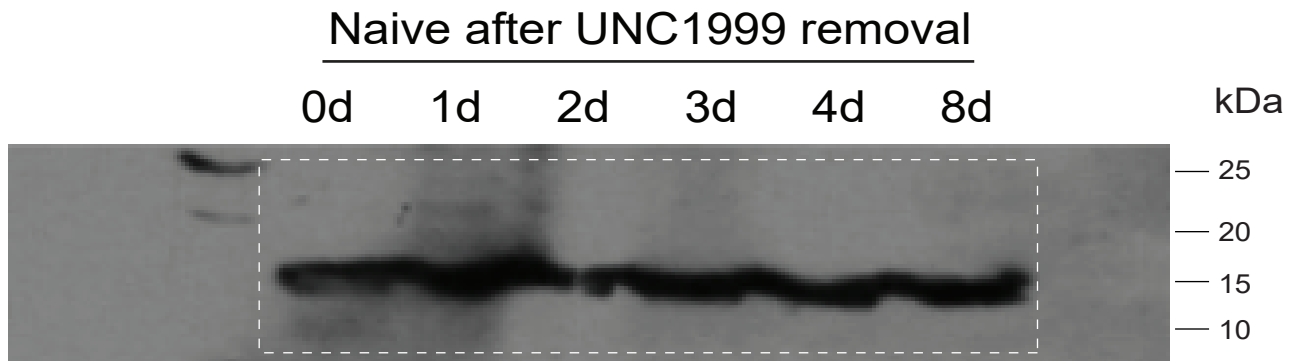

Source Data  
Extended Data Figure 4A
